# Supplementary material for: Cytological, Biochemical and Molecular Events of the Embryogenic State in Douglas-fir (Pseudotsuga menziesii [Mirb.])
Source: PubMed Central journal article supplement (PMC6403139; doi:10.3389/fpls.2019.00118), 2019-02-28
Supplement: Image_1.pdf [file Image_1.pdf]

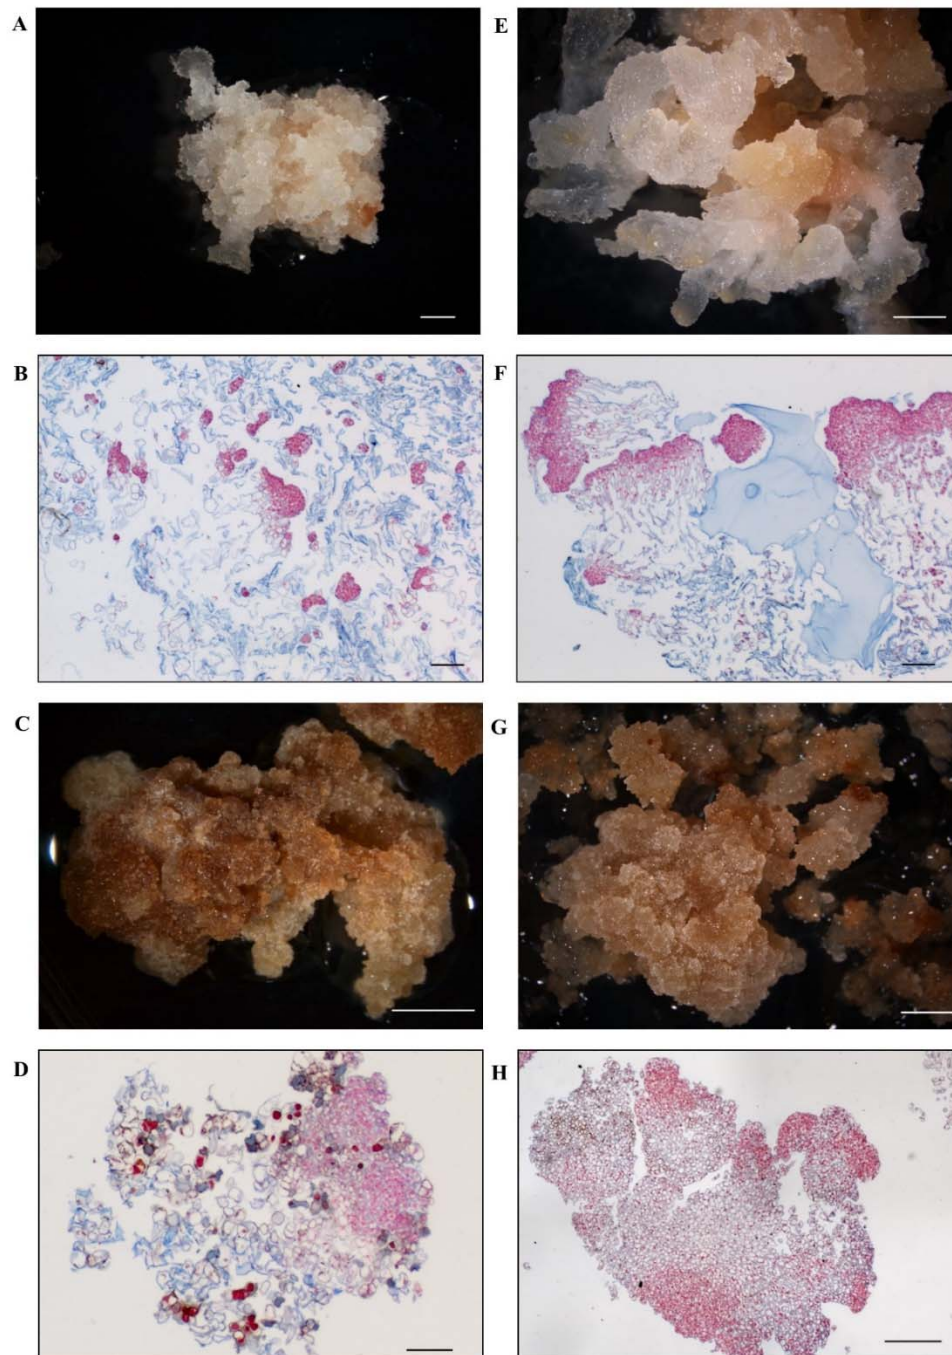

**Supplementary Figure S1.** Morphological and histological characterization of isogenic embryonal mass (EM) and non-embryogenic callus (NEC) of Douglas-fir.

(A) Morphology of SD4-8 EM, (B) Small somatic embryos of SD4-8 EM; paraffin section stained with Nuclear Fast Red/Alcian Blue; (C) Morphology of SD4-8 NEC; (D) Histology of SD4-8 NEC; note the cells accumulating phenolic compounds (in grey-blue, brownish or amber colour); (E) morphology of TD17-1 EM; (F) Polyembryogenic centres of TD17-1 EM; (G) morphology of TD17-1 NEC, (H) Histology of TD15-1 NEC. Scale bars represent: 2 mm (A, E); 500  $\mu\text{m}$  (C, H); 200  $\mu\text{m}$  (B, D, F).
