# Supplementary material for: Cytological, Biochemical and Molecular Events of the Embryogenic State in Douglas-fir (Pseudotsuga menziesii [Mirb.])
Source: PubMed Central journal article supplement (PMC6403139; doi:10.3389/fpls.2019.00118), 2019-02-28
Supplement: Image_6.pdf [file Image_6.pdf]

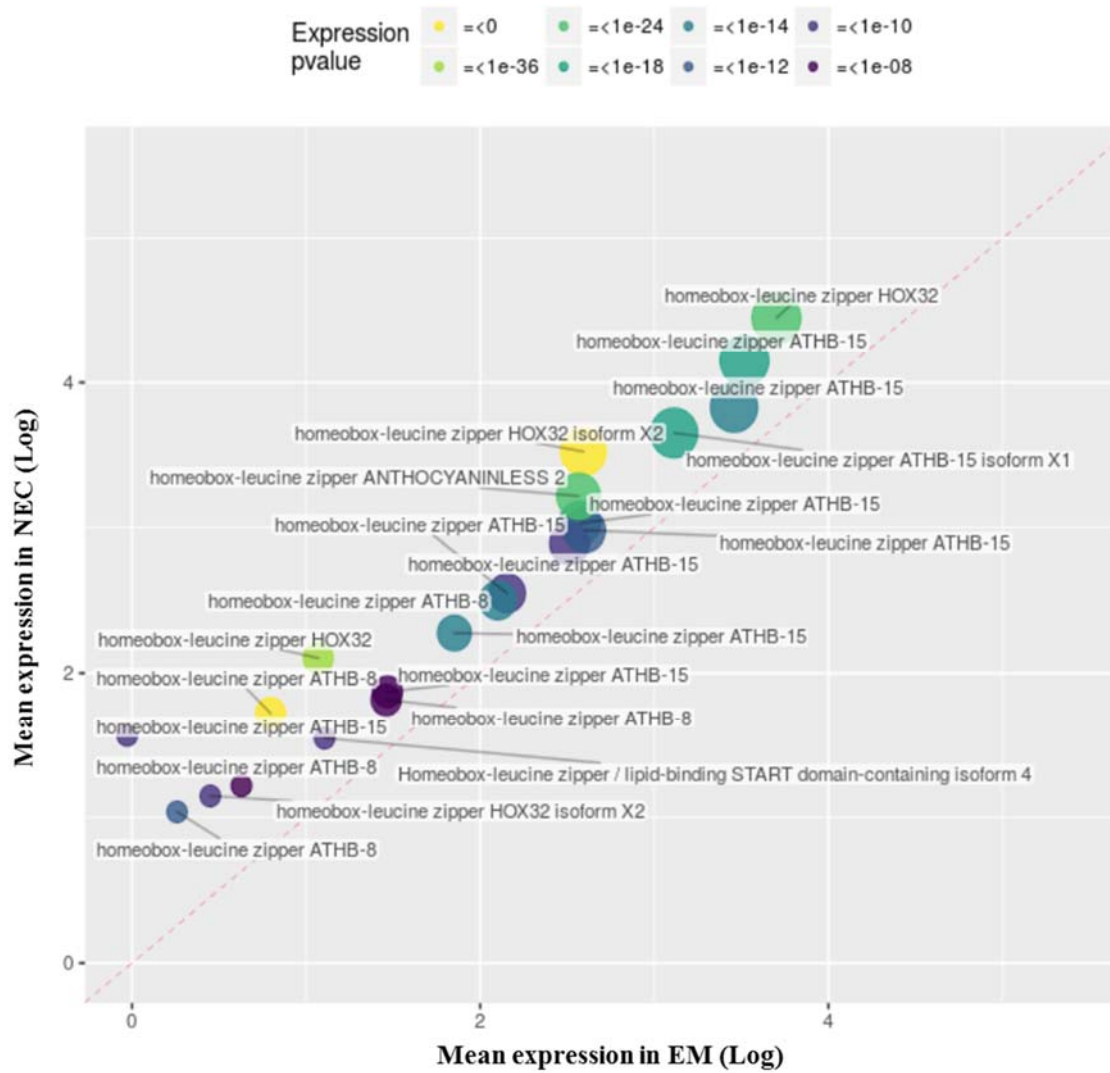

**Supplementary Figure S6.** Transcripts upregulated in embryonal mass (EM) relative to non-embryogenic callus (NEC) annotated to MF GO:0008289, “lipid binding”. See legend of **Figure 7** for further information.
