# Supplementary material for: Cytological, Biochemical and Molecular Events of the Embryogenic State in Douglas-fir (Pseudotsuga menziesii [Mirb.])
Source: PubMed Central journal article supplement (PMC6403139; doi:10.3389/fpls.2019.00118), 2019-02-28
Supplement: Image_7.pdf [file Image_7.pdf]

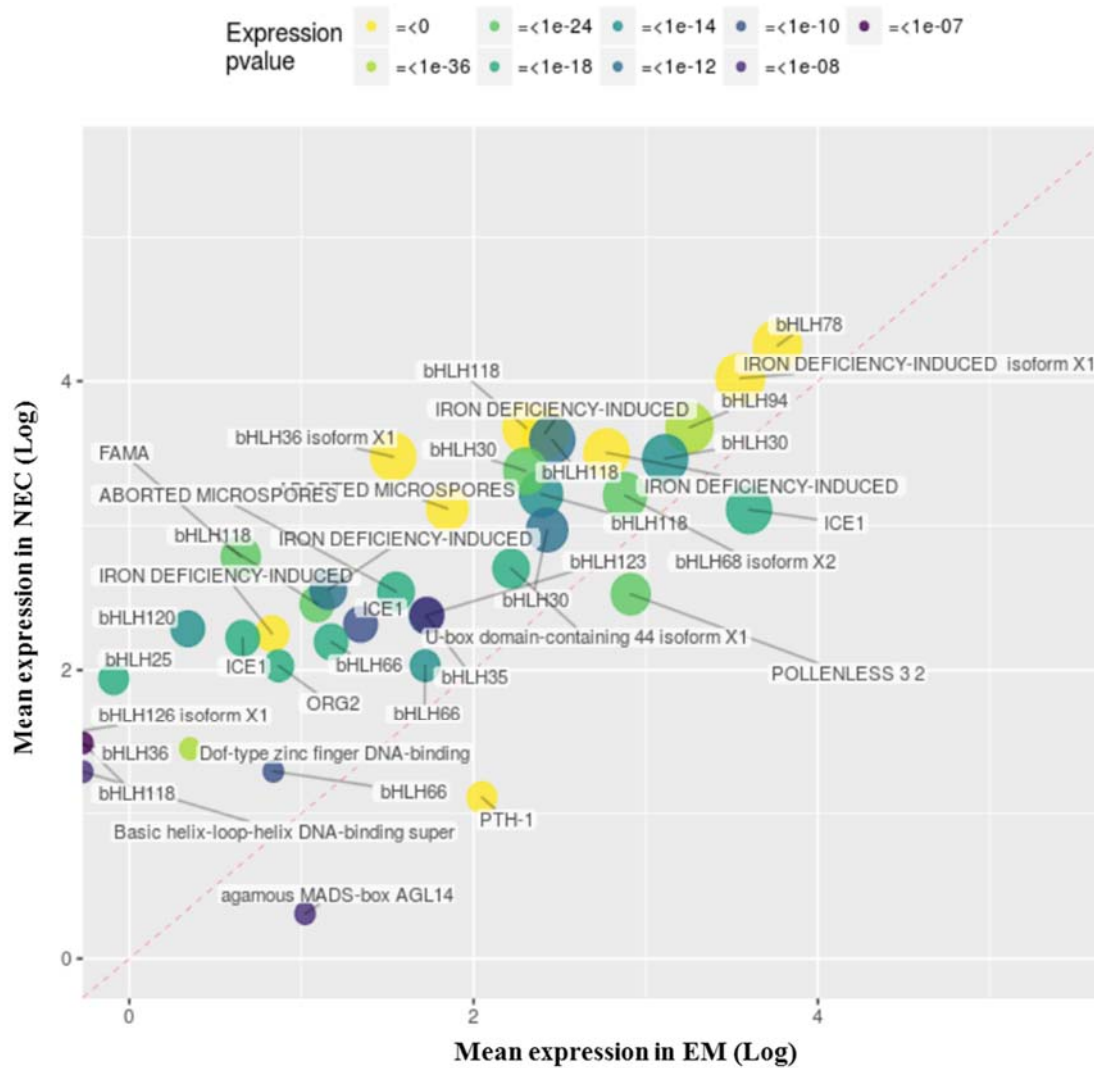

**Supplementary Figure S7.** Transcripts upregulated in non-embryogenic callus (NEC) relative to embryonal mass (EM) annotated to MF GO:0046983, “protein dimerization activity”. See legend of **Figure 7** for further information.
