# Supplementary material for: Cytological, Biochemical and Molecular Events of the Embryogenic State in Douglas-fir (Pseudotsuga menziesii [Mirb.])
Source: PubMed Central journal article supplement (PMC6403139; doi:10.3389/fpls.2019.00118), 2019-02-28
Supplement: Table_1.pdf [file Table_1.pdf]

**Supplementary Table S1** Soluble sugar and starch contents of isogenic embryonal mass (EM) and non-embryogenic callus (NEC) of three genotypes (SD4-8, TD15-1, TD17-1) of Douglas-fir during the proliferation phase of somatic embryogenesis.

|                                                            | SD4-8 EM |         | SD4-8 NEC |         | TD15-1 EM |         | TD15-1 NEC |         | TD17-1 EM |         | TD17-1 NEC |         |
|------------------------------------------------------------|----------|---------|-----------|---------|-----------|---------|------------|---------|-----------|---------|------------|---------|
| <b>Carbohydrate (<math>\mu\text{g g}^{-1}</math> d.w.)</b> |          |         |           |         |           |         |            |         |           |         |            |         |
| <b>fructose</b>                                            | 18.9     | ± 0.63* | 3.87      | ± 0.14* | 17.5      | ± 3.27  | 4.53       | ± 0.46  | 15.0      | ± 1.75  | 23.9       | ± 7.92  |
| <b>galactose</b>                                           | 2.22     | ± 0.17  | 0         | ±       | 3.31      | ± 0.46  | 0          |         | 2.50      | ± 0.30  | 0          |         |
| <b>glucose</b>                                             | 209.9    | ± 12.5* | 13.6      | ± 0.70* | 203.3     | ± 25.3* | 78.6       | ± 10.0* | 211.9     | ± 13.1  | 180.1      | ± 15.1  |
| <b>maltose</b>                                             | 0        | ±       | 3.57      | ± 0.12  | 6.09      | ± 0.38  | 15.5       | ± 13.8  | 0         |         | 7.74       | ± 1.23  |
| <b>melibiose</b>                                           | 4.06     | ± 0.29  | 0         | ±       | 2.83      | ± 0.31  | 0          |         | 3.49      | ± 0.43  | 0          |         |
| <b>myo-inositol</b>                                        | 3.38     | ± 0.23  | 3.53      | ± 0.13  | 4.06      | ± 0.27  | 4.56       | ± 0.52  | 2.46      | ± 0.23  | 4.01       | ± 0.26  |
| <b>raffinose</b>                                           | 16.9     | ± 1.49* | 1.91      | ± 0.13* | 6.88      | ± 0.88  | 6.62       | ± 3.64  | 10.9      | ± 2.00  | 7.48       | ± 0.86  |
| <b>sucrose</b>                                             | 59.4     | ± 2.24* | 17.3      | ± 2.31* | 18.4      | ± 4.01  | 21.1       | ± 4.54  | 45.8      | ± 6.23  | 42.1       | ± 3.25  |
| <b>starch (<math>\text{mg g}^{-1}</math> d.w.)</b>         | 10.2*    | ± 0.21* | 19.3      | ± 2.44* | 2.56      | ± 0.37* | 8.69       | ± 2.42* | 14.9      | ± 1.76* | 26.8       | ± 0.66* |

Values are means of four measurements  $\pm$  CI 5% error level. Asterisks indicate significant differences between EM and NEC lines obtained from multiple comparison of means ( $P < 0.05$ ).
