# Supplementary material for: Cytological, Biochemical and Molecular Events of the Embryogenic State in Douglas-fir (Pseudotsuga menziesii [Mirb.])
Source: PubMed Central journal article supplement (PMC6403139; doi:10.3389/fpls.2019.00118), 2019-02-28
Supplement: Table_2.pdf [file Table_2.pdf]

**Supplementary Table S2.** Concentrations of endogenous phytohormones in isogenic embryonal mass (EM) and non-embryogenic callus (NEC) of three genotypes (SD4-8, TD15-1, TD17-1) of Douglas fir after two weeks of proliferation.

| Phytohormones*<br>(pmol.g <sup>-1</sup> d.w.) | EM                        |                             |                             | NEC                           |                              |                              |
|-----------------------------------------------|---------------------------|-----------------------------|-----------------------------|-------------------------------|------------------------------|------------------------------|
|                                               | SD4-8                     | TD15-1                      | TD17-1                      | SD4-8                         | TD15-1                       | TD17-1                       |
| IAA                                           | 301.45±11.69 <sup>a</sup> | 241.81±60.62 <sup>a</sup>   | 246.90±32.42 <sup>a</sup>   | 266.58±30.44 <sup>a</sup>     | 110.15±8.93 <sup>a</sup>     | 153.57±43.04 <sup>a</sup>    |
| ABA                                           | 176.60±20.76 <sup>a</sup> | 139.40±51.69 <sup>a</sup>   | 513.91±297.39 <sup>a</sup>  | 4013.45±1481.83 <sup>b</sup>  | 756.49±283.88 <sup>b</sup>   | 1927.8±1187.97 <sup>a</sup>  |
| ABA-GE                                        | 329.67±76.31 <sup>a</sup> | 33.58±8.26 <sup>a</sup>     | 128.73±53.58 <sup>a</sup>   | 37055.47±6038.00 <sup>b</sup> | 1401.17±309.58 <sup>b</sup>  | 6437.11±4683.65 <sup>b</sup> |
| <b>Isoprenoid CKs</b>                         |                           |                             |                             |                               |                              |                              |
| <i>transZ</i>                                 | 0                         | 0                           | 0                           | 0                             | 0                            | 0                            |
| <i>transZR</i>                                | 0                         | 0.12±0.06                   | 0.28±0.06                   | 0                             | 0                            | 0                            |
| <i>transZRMP</i>                              | 0                         | 0                           | 0                           | 0                             | 0                            | 0                            |
| <i>transZROG</i>                              | 0                         | 0                           | 0                           | 0                             | 0                            | 0                            |
| <i>transZOG</i>                               | 0.23±0.03                 | 0.12±0.06                   | 0.50±0.16                   | 1.77±0.94                     | 0.56±0.18                    | 1.81±0.51                    |
| <i>transZ7G</i>                               | 0                         | 0                           | 0                           | 3.52±0.14                     | 0.58±0.28                    | 0.63±0.37                    |
| <i>transZ9G</i>                               | 0                         | 0                           | 0                           | 0                             | 0                            | 0                            |
| <b>Total <i>transZ</i>-types</b>              | <b>0.23</b>               | <b>0.24</b>                 | <b>0.78</b>                 | <b>5.3</b>                    | <b>1.15</b>                  | <b>2.44</b>                  |
| <i>cisZ</i>                                   | 0                         | 0                           | 0                           | 0                             | 0                            | 0                            |
| <i>cisZR</i>                                  | 4.01±0.33                 | 3.95±0.37                   | 4.07±0.44                   | 7.00±0.64                     | 2.63±0.58                    | 1.74±1.03                    |
| <i>cisZRMP</i>                                | 6.94±0.79                 | 2.49±0.80                   | 3.71±0.59                   | 5.23±1.64                     | 1.97±1.08                    | 1.07±0.53                    |
| <i>cisZROG</i>                                | 0                         | 0                           | 0                           | 9.21±0.68                     | 0.42±0.14                    | 0                            |
| <i>cisZOG</i>                                 | 0                         | 0                           | 0                           | 0                             | 0                            | 0                            |
| <i>cisZ7G</i>                                 | 0                         | 0                           | 0                           | 3.48±1.06                     | 0                            | 0.89±0.51                    |
| <i>cisZ9G</i>                                 | 0                         | 0                           | 0                           | 0                             | 0                            | 0                            |
| <b>Total <i>cisZ</i>-types</b>                | <b>10.94</b>              | <b>6.44</b>                 | <b>7.78</b>                 | <b>24.93</b>                  | <b>5.01</b>                  | <b>3.71</b>                  |
| iP                                            | 1.50±0.66                 | 0.85±0.22                   | 1.10±0.07                   | 1.67±0.18                     | 0.64±0.28                    | 2.98±2.16                    |
| iPR                                           | 1.00±0.15                 | 1.52±0.48                   | 0.91±0.12                   | 0                             | 0.87±0.22                    | 0.82±0.38                    |
| iPRMP                                         | 2.98±0.60                 | 3.11±0.89                   | 1.55±0.46                   | 1.99±0.75                     | 4.22±0.34                    | 3.03±0.49                    |
| iP7G                                          | 0                         | 0                           | 0                           | 0                             | 0                            | 0                            |
| iP9G                                          | 0                         | 0                           | 0                           | 0                             | 0                            | 0                            |
| <b>Total iP-types</b>                         | <b>5.48</b>               | <b>5.49</b>                 | <b>3.56</b>                 | <b>3.66</b>                   | <b>5.73</b>                  | <b>6.82</b>                  |
| DHZ                                           | 0                         | 0                           | 0                           | 0                             | 0                            | 0                            |
| DHZR                                          | 0                         | 0                           | 0                           | 0                             | 0                            | 0                            |
| DHZRMP                                        | 0.53±0.10                 | 0.58±0.39                   | 0.64±0.10                   | 0.59±0.49                     | 0.25±0.07                    | 0.58±0.27                    |
| DHZROG                                        | 0                         | 0                           | 0                           | 0                             | 0                            | 0                            |
| DHZOG                                         | 0                         | 0                           | 0                           | 0                             | 0                            | 0                            |
| DHZ7G                                         | 0.36±0.09                 | 0                           | 0.58±0.09                   | 0                             | 0                            | 0.64±0.13                    |
| DHZ9G                                         | 0                         | 0                           | 0                           | 0                             | 0                            | 0                            |
| <b>Total DHZ-types</b>                        | <b>0.89</b>               | <b>0.58</b>                 | <b>1.22</b>                 | <b>0.59</b>                   | <b>0.25</b>                  | <b>1.23</b>                  |
| <b>∑ Isoprenoid CKs</b>                       | <b>17.54</b>              | <b>12.74</b>                | <b>13.34</b>                | <b>34.48</b>                  | <b>12.14</b>                 | <b>14.21</b>                 |
| <b>Aromatic CKs</b>                           |                           |                             |                             |                               |                              |                              |
| BA                                            | 5486.1±434.2 <sup>a</sup> | 6716.79±395.41 <sup>a</sup> | 4853.41±352.34 <sup>a</sup> | 27048.7±11899.1 <sup>b</sup>  | 7674.02±1894.03 <sup>a</sup> | 3086.45±622.12 <sup>b</sup>  |
| BAR                                           | 176.3±28.16 <sup>a</sup>  | 172.23±20.11 <sup>a</sup>   | 142.63±11.96 <sup>a</sup>   | 530.05±110.04 <sup>b</sup>    | 1729.5±277.07 <sup>b</sup>   | 133.69±27.25 <sup>a</sup>    |
| BARMP                                         | 350.66±62.58 <sup>a</sup> | 379.40±46.86 <sup>a</sup>   | 298.26±49.00 <sup>a</sup>   | 1655.14±72.27 <sup>b</sup>    | 5187.6±1132.87 <sup>b</sup>  | 375.69±96.79 <sup>a</sup>    |
| BA3G + BA7G                                   | 6.19±1.84 <sup>a</sup>    | 7.83±2.27 <sup>a</sup>      | 6.54±2.63 <sup>a</sup>      | 221.97±41.53 <sup>b</sup>     | 22.14±3.90 <sup>b</sup>      | 20.46±2.4 <sup>b</sup>       |
| BA9G                                          | 11.09±1.12 <sup>a</sup>   | 4.55±1.17 <sup>a</sup>      | 3.73±1.75 <sup>a</sup>      | 1578.89±214.41 <sup>b</sup>   | 117.49±20.39 <sup>b</sup>    | 46.99±31.88 <sup>a</sup>     |
| <b>Total BA-types</b>                         | <b>6030.33</b>            | <b>7280.8</b>               | <b>5304.57</b>              | <b>31034.76</b>               | <b>14730.75</b>              | <b>3663.28</b>               |
| OH-BA                                         | 5.07±0.11                 | 4.84±0.85                   | 11.75±7.35                  | 69.08±25.59                   | 28.28±3.72                   | 3.63±1.80                    |
| OH-BAR                                        | 0.17±0.10                 | 0.90±0.12                   | 0.49±0.1                    | 16.18±5.2                     | 4.13±0.67                    | 0.51±0.33                    |
| OH-BARMP                                      | 0.87±0.24                 | 7.32±3.59                   | 3.03±0.72                   | 4.6±0.63                      | 11.26±1.13                   | 1.35±0.78                    |
| OH-BA9G                                       | 0                         | 0                           | 0                           | 1.68±0.73                     | 0.43±0.65                    | 0                            |
| <b>Total OH-BA derivatives</b>                | <b>6.12</b>               | <b>13.06</b>                | <b>15.27</b>                | <b>91.54</b>                  | <b>44.10</b>                 | <b>5.49</b>                  |

All data are means ± CI. Different letters indicate significant differences according to multiple comparisons of means (P < 0.05, n=3-4).

\*IAA, indole 3-acetic acid; ABA, abscisic acid, ABA-GE, ABA-glucose ester; Isoprenoid cytokinins (CKs) included *trans*-zeatin (*transZ*), *cis*-zeatin (*cisZ*), N<sup>6</sup>-(Δ<sup>2</sup>-isopentenyl)adenine (iP) and dihydrozeatin (DHZ) types;

Aromatic CKs included *N*<sup>6</sup>-benzyladenine (BA) types, including derivatives hydroxylated on the side-chain phenyl ring in *ortho*, *meta* and *para* positions (OH-BA types). Abbreviations of CKs adopted and modified according to Kamínek et al. (2000).
