# Supplementary material for: Cytological, Biochemical and Molecular Events of the Embryogenic State in Douglas-fir (Pseudotsuga menziesii [Mirb.])
Source: PubMed Central journal article supplement (PMC6403139; doi:10.3389/fpls.2019.00118), 2019-02-28
Supplement: Table_3.pdf [file Table_3.pdf]

**Supplementary Table S3.** Up-regulation of 96 Douglas transcripts set in EM grouped under 'GO:0003723' (pvalue =  $2.4e^{-24}$ , from TopGO) MF ontology. Douglas transcript identification (ID\_Douglas) is from Douglas reference transcriptome (Neale's Laboratory, UC Davis). Functional annotation (Function), *Arabidopsis thaliana* orthology (At\_orthologs) and GO ontologies (MF, molecular function ; BP, biological process ; CC, cellular component) were obtained from Blast2GO. pvalue : FDR adjusted pvalue for differential expression obtained from DESeq2. mean mapping score and standard errors, ME, NE and  $\pm se$  are provided for EM (n=16) and NEC (n = 21) respectively. FC : fold-change. Expr : trend of expression relative to fold-change. Mapping scores are rounded to integer.

| ID_Douglas       | Function                                              | At_ortholog | MF                                                                                                                                                                               | BP                                                                                                                                                 | CC                       | Expr. | FC    | pvalue     | EM               | NEC            |
|------------------|-------------------------------------------------------|-------------|----------------------------------------------------------------------------------------------------------------------------------------------------------------------------------|----------------------------------------------------------------------------------------------------------------------------------------------------|--------------------------|-------|-------|------------|------------------|----------------|
| PSME_00000323-RA | Os09g0400100                                          | AT4G39330.1 | GO:0098519 GO:0016887 GO:0016787<br>GO:0016740 GO:0016301 GO:0009378<br>GO:0008134 GO:0005525 GO:0005524<br>GO:0003924 GO:0003724 GO:0003723<br>GO:0003677 GO:0003676 GO:0000166 | GO:0007264 GO:0006810<br>GO:0006777 GO:0006614<br>GO:0006576 GO:0006355<br>GO:0006310 GO:0006281<br>GO:0002949                                     |                          | EM    | 276,1 | $4e^{-28}$ | 4612 $\pm$ 1192  | 13 $\pm$ 3     |
| PSME_00000476-RA | ATP-dependent chaperone ClpB                          | AT1G74310.1 | GO:0098519 GO:0016887 GO:0016787<br>GO:0016301 GO:0009378 GO:0008134<br>GO:0005525 GO:0005524 GO:0003924<br>GO:0003724 GO:0003723 GO:0003677                                     | GO:0019538 GO:0007264<br>GO:0007155 GO:0006914<br>GO:0006810 GO:0006614<br>GO:0006355 GO:0006310<br>GO:0006281 GO:0002949                          |                          | NE    | 4,1   | $1e^{-24}$ | 2387 $\pm$ 223   | 9754 $\pm$ 813 |
| PSME_00000477-RA | chaperone ClpB1                                       | AT1G74310.1 | GO:0098519 GO:0016887 GO:0016787<br>GO:0016301 GO:0009378 GO:0008134<br>GO:0005525 GO:0005524 GO:0003924<br>GO:0003724 GO:0003723 GO:0003677                                     | GO:0019538 GO:0008608<br>GO:0007264 GO:0007155<br>GO:0006914 GO:0006810<br>GO:0006614 GO:0006576<br>GO:0006355 GO:0006310<br>GO:0006281 GO:0002949 | GO:0042729<br>GO:0005876 | NE    | 3,5   | $2e^{-22}$ | 1427 $\pm$ 129   | 5029 $\pm$ 410 |
| PSME_00000852-RA | LRR receptor serine/threonine-kinase ERL1             | AT5G62230.1 | GO:0016887 GO:0009378 GO:0008134<br>GO:0005524 GO:0003724 GO:0003723<br>GO:0003678                                                                                               | GO:0006355 GO:0006310<br>GO:0006281 GO:0002949                                                                                                     |                          | EM    | 17,7  | $4e^{-07}$ | 786 $\pm$ 93     | 38 $\pm$ 13    |
| PSME_00001272-RA | arginine/serine-rich-splicing factor RSP41 isoform X1 | AT3G61860.1 | GO:0046872 GO:0004535 GO:0003723<br>GO:0003676                                                                                                                                   | GO:0006402                                                                                                                                         | GO:0005737<br>GO:0005634 | NE    | 9,4   | $5e^{-20}$ | 313 $\pm$ 71     | 3012 $\pm$ 309 |
| PSME_00001740-RA | BREAST CANCER SUSCEPTIBILITY 1 homolog                | AT1G04020.1 | GO:0016887 GO:0009378 GO:0005524<br>GO:0003724 GO:0003723                                                                                                                        | GO:0006310 GO:0006281                                                                                                                              |                          | EM    | 2,6   | $9e^{-14}$ | 125 $\pm$ 8      | 47 $\pm$ 5     |
| PSME_00001938-RA | ABC transporter B member 9                            | AT2G47000.1 | GO:0042626 GO:0031683 GO:0019001<br>GO:0016887 GO:0016301 GO:0008134<br>GO:0005525 GO:0005524 GO:0004871<br>GO:0003924 GO:0003860 GO:0003724<br>GO:0003723                       | GO:0055085 GO:0008152<br>GO:0007186 GO:0006810<br>GO:0006355                                                                                       | GO:0016021               | NE    | 4,8   | $7e^{-07}$ | 30 $\pm$ 5       | 151 $\pm$ 24   |
| PSME_00002021-RA | serine carboxypeptidase 45                            | AT1G28110.1 | GO:0015093 GO:0005525 GO:0003924<br>GO:0003724 GO:0003723                                                                                                                        | GO:0015684                                                                                                                                         | GO:0016021               | EM    | 7,5   | $1e^{-23}$ | 11566 $\pm$ 2253 | 1526 $\pm$ 141 |
| PSME_00002394-RA | galactinol synthase 1                                 | AT2G47180.1 | GO:0016887 GO:0005525 GO:0005524<br>GO:0003924 GO:0003724 GO:0003723                                                                                                             |                                                                                                                                                    | GO:0016020               | EM    | 4,2   | $4e^{-07}$ | 242 $\pm$ 34     | 56 $\pm$ 9     |
| PSME_00002564-RA | glucan 13-beta-glucosidase A                          |             | GO:0003723                                                                                                                                                                       |                                                                                                                                                    |                          | EM    | 24,5  | $9e^{-07}$ | 419 $\pm$ 114    | 13 $\pm$ 6     |
| PSME_00002668-RA | cytokinin dehydrogenase 1                             | AT3G63440.1 | GO:0019901 GO:0005515 GO:0003723                                                                                                                                                 | GO:0016070 GO:0010508<br>GO:0007030 GO:0006914                                                                                                     |                          | EM    | 16,9  | $2e^{-14}$ | 378 $\pm$ 62     | 21 $\pm$ 5     |
| PSME_00004238-RA | Coatomer subunit beta-1                               | AT1G59870.1 | GO:0098519 GO:0016887 GO:0016301<br>GO:0009378 GO:0005525 GO:0005524<br>GO:0003924 GO:0003724 GO:0003723                                                                         | GO:0007264 GO:0006777<br>GO:0006576 GO:0006310<br>GO:0006281 GO:0002949                                                                            | GO:0016020               | NE    | 11    | $2e^{-06}$ | 2 $\pm$ 1        | 27 $\pm$ 5     |

|                  |                                             |             |                                                                                                                                                                       |                                                                                                                                         |                          |    |      |                   |            |            |
|------------------|---------------------------------------------|-------------|-----------------------------------------------------------------------------------------------------------------------------------------------------------------------|-----------------------------------------------------------------------------------------------------------------------------------------|--------------------------|----|------|-------------------|------------|------------|
| PSME_00004494-RA | transcription repressor MYB5                | AT1G22640.1 | GO:0098519 GO:0016887 GO:0005525<br>GO:0005524 GO:0004127 GO:0003924<br>GO:0003724 GO:0003723                                                                         | GO:0006139                                                                                                                              | GO:0016020               | EM | 18,6 | 8e <sup>-09</sup> | 206 ±34    | 10 ±3      |
| PSME_00004747-RA | APO 3 mitochondrial                         | AT5G61930.1 | GO:0003723                                                                                                                                                            |                                                                                                                                         |                          | EM | 2,2  | 1e <sup>-08</sup> | 171 ±15    | 79 ±7      |
| PSME_00005341-RA | chaperone ClpB1                             | AT1G74310.1 | GO:0098519 GO:0016887 GO:0016787<br>GO:0016301 GO:0009378 GO:0008134<br>GO:0005525 GO:0005524 GO:0003924<br>GO:0003724 GO:0003723 GO:0003677                          | GO:0019538 GO:0008608<br>GO:0007264 GO:0007155<br>GO:0006914 GO:0006810<br>GO:0006614 GO:0006355<br>GO:0006310 GO:0006281<br>GO:0002949 | GO:0042729<br>GO:0005876 | NE | 2,9  | 6e <sup>-19</sup> | 4275 ±451  | 12236 ±523 |
| PSME_00007886-RA | PHD finger MALE STERILITY 1                 | AT5G22260.1 | GO:0003723                                                                                                                                                            |                                                                                                                                         |                          | EM | 4,4  | 1e <sup>-04</sup> | 22 ±4      | 5 ±1       |
| PSME_00007978-RA | Germin sub 1 member 1                       | AT1G02335.1 | GO:0016887 GO:0009378 GO:0005524<br>GO:0003724 GO:0003723 GO:0003678<br>GO:0003677                                                                                    | GO:0006310 GO:0006281                                                                                                                   |                          | EM | 6,6  | 2e <sup>-05</sup> | 76 ±11     | 11 ±3      |
| PSME_00008177-RA | blue copper                                 | AT1G08500.1 | GO:0016887 GO:0009378 GO:0005524<br>GO:0005126 GO:0003724 GO:0003723                                                                                                  | GO:0019079 GO:0006955<br>GO:0006310 GO:0006281<br>GO:0002949                                                                            | GO:0005576               | EM | 3,4  | 2e <sup>-31</sup> | 2617 ±154  | 764 ±58    |
| PSME_00008587-RA | abscisic stress-ripening 2                  |             | GO:0003723                                                                                                                                                            |                                                                                                                                         |                          | EM | 50,6 | 5e <sup>-36</sup> | 794 ±145   | 15 ±3      |
| PSME_00009075-RA | 7-deoxyloganetin glucosyltransferase        | AT1G22400.1 | GO:0004525 GO:0003723                                                                                                                                                 | GO:0006396                                                                                                                              |                          | EM | 2,5  | 7e <sup>-06</sup> | 91 ±8      | 36 ±6      |
| PSME_00009405-RA | Sulfate/thiosulfate import ATP-binding cysA | AT3G07350.1 | GO:0003723 GO:0003676                                                                                                                                                 |                                                                                                                                         |                          | EM | 6,6  | 2e <sup>-11</sup> | 1450 ±129  | 216 ±37    |
| PSME_00009681-RA | : S-acyltransferase 21                      | AT4G15080.1 | GO:0008168 GO:0003723                                                                                                                                                 | GO:0008033 GO:0006364                                                                                                                   |                          | EM | 3,2  | 1e <sup>-25</sup> | 848 ±41    | 260 ±26    |
| PSME_00009725-RA | multidrug resistance 1 2                    | AT1G02520.1 | GO:0042626 GO:0031683 GO:0019001<br>GO:0016887 GO:0016301 GO:0008134<br>GO:0005525 GO:0005524 GO:0004871<br>GO:0003924 GO:0003724 GO:0003723<br>GO:0003676            | GO:0055085 GO:0008152<br>GO:0007264 GO:0007186<br>GO:0006810 GO:0006355                                                                 | GO:0016021               | NE | 3    | 4e <sup>-27</sup> | 387 ±18    | 1184 ±87   |
| PSME_00010934-RA | peptidyl-prolyl cis-trans isomerase CYP40   | AT2G15790.1 | GO:0098519 GO:0043531 GO:0016887<br>GO:0016787 GO:0016740 GO:0016301<br>GO:0009378 GO:0008134 GO:0005524<br>GO:0004127 GO:0003724 GO:0003723<br>GO:0003678 GO:0003677 | GO:0019079 GO:0006810<br>GO:0006576 GO:0006355<br>GO:0006310 GO:0006281<br>GO:0006139 GO:0002949                                        |                          | EM | 4    | 1e <sup>-47</sup> | 12492 ±265 | 3149 ±244  |
| PSME_00011755-RA | ATP binding                                 | AT4G25835.1 | GO:0016887 GO:0009378 GO:0005524<br>GO:0003724 GO:0003723                                                                                                             | GO:0006310 GO:0006281                                                                                                                   |                          | NE | 7,2  | 7e <sup>-29</sup> | 687 ±92    | 5011 ±481  |
| PSME_00011756-RA | ATP binding                                 | AT4G25835.1 | GO:0016887 GO:0009378 GO:0005524<br>GO:0003724 GO:0003723                                                                                                             | GO:0006310 GO:0006281                                                                                                                   |                          | NE | 4,4  | 5e <sup>-11</sup> | 326 ±68    | 1447 ±132  |
| PSME_00011757-RA | mitochondrial chaperone BCS1                | AT4G25835.1 | GO:0016887 GO:0009378 GO:0005524<br>GO:0003724 GO:0003723                                                                                                             | GO:0006310 GO:0006281                                                                                                                   |                          | NE | 4,5  | 3e <sup>-11</sup> | 486 ±101   | 2239 ±225  |
| PSME_00011996-RA | anthocyanidin reductase                     | AT1G61720.1 | GO:0050662 GO:0016616 GO:0016301<br>GO:0005524 GO:0003854 GO:0003824<br>GO:0003723                                                                                    | GO:0055114 GO:0006694<br>GO:0006353                                                                                                     |                          | NE | 11,4 | 6e <sup>-24</sup> | 17 ±4      | 191 ±23    |
| PSME_00012081-RA | kinesin NACK2 isoform X2                    | AT1G18370.1 | GO:0016887 GO:0009378 GO:0008134<br>GO:0005524 GO:0003724 GO:0003723<br>GO:0003677                                                                                    | GO:0006810 GO:0006576<br>GO:0006355 GO:0006310<br>GO:0006281 GO:0006260<br>GO:0002949                                                   |                          | EM | 78,2 | 2e <sup>-20</sup> | 30 ±7      | 0 ±0       |
| PSME_00012402-RA | ice binding                                 | AT1G65450.1 | GO:0003723 GO:0003676                                                                                                                                                 |                                                                                                                                         |                          | EM | 31,9 | 1e <sup>-30</sup> | 147 ±21    | 4 ±1       |

|                  |                                                      |             |                                                                                                                                              |                                                                                       |                          |    |       |                   |             |             |
|------------------|------------------------------------------------------|-------------|----------------------------------------------------------------------------------------------------------------------------------------------|---------------------------------------------------------------------------------------|--------------------------|----|-------|-------------------|-------------|-------------|
| PSME_00012550-RA | cell division cycle 48 homolog                       | AT5G03340.1 | GO:0033897 GO:0003735 GO:0003723                                                                                                             | GO:0006412                                                                            | GO:0005840<br>GO:0005622 | EM | 2,1   | 6e <sup>-07</sup> | 96 ±9       | 46 ±4       |
| PSME_00012870-RA | Coatomer subunit beta-1                              | AT1G15520.1 | GO:0098519 GO:0016887 GO:0016301<br>GO:0009378 GO:0005525 GO:0005524<br>GO:0003924 GO:0003724 GO:0003723                                     | GO:0007264 GO:0006614<br>GO:0006576 GO:0006310<br>GO:0006281 GO:0002949               | GO:0016020               | NE | 44,6  | 1e <sup>-39</sup> | 740 ±197    | 34811 ±6556 |
| PSME_00013088-RA | UDP-glycosyltransferase 86A1                         | AT2G36970.1 | GO:0009982 GO:0003723                                                                                                                        | GO:0009451 GO:0001522                                                                 |                          | EM | 5,7   | 1e <sup>-05</sup> | 770 ±95     | 130 ±37     |
| PSME_00013643-RA | pleiotropic drug resistance 1                        | AT1G66950.1 | GO:0098519 GO:0016887 GO:0016301<br>GO:0015093 GO:0005525 GO:0005524<br>GO:0003924 GO:0003724 GO:0003723                                     | GO:0015684 GO:0007264<br>GO:0006576 GO:0002949                                        | GO:0016021<br>GO:0016020 | NE | 249,4 | 1e <sup>-21</sup> | 5 ±1        | 1634 ±681   |
| PSME_00014534-RA | GDSL esterase/lipase At4g01130                       | AT4G01130.1 | GO:0003723                                                                                                                                   |                                                                                       |                          | EM | 11,7  | 1e <sup>-09</sup> | 726 ±81     | 58 ±28      |
| PSME_00014771-RA | Os10g0458700                                         | AT3G01410.1 | GO:0098519 GO:0016887 GO:0016301<br>GO:0009378 GO:0005525 GO:0005524<br>GO:0003924 GO:0003724 GO:0003723                                     | GO:0006810 GO:0006614<br>GO:0006576 GO:0006310<br>GO:0006281 GO:0002949               | GO:0016020               | EM | 88,1  | 8e <sup>-14</sup> | 26 ±8       | 0 ±0        |
| PSME_00014849-RA | L-ascorbate oxidase homolog                          | AT4G22010.1 | GO:0015078 GO:0009982 GO:0003735<br>GO:0003723                                                                                               | GO:0015986 GO:0009451<br>GO:0006412 GO:0001522                                        | GO:0045263<br>GO:0005840 | EM | 49,6  | 5e <sup>-41</sup> | 864 ±105    | 16 ±4       |
| PSME_00015395-RA | Coatomer subunit beta-1                              | AT1G15520.1 | GO:0016887 GO:0009378 GO:0005524<br>GO:0003724 GO:0003723                                                                                    | GO:0006310 GO:0006281                                                                 |                          | EM | 2,6   | 1e <sup>-12</sup> | 39031 ±2358 | 15004 ±1623 |
| PSME_00015801-RA | pectinesterase isoform X1                            | AT5G19730.1 | GO:0098519 GO:0043531 GO:0016887<br>GO:0016787 GO:0016301 GO:0009378<br>GO:0008134 GO:0005524 GO:0003724<br>GO:0003723 GO:0003678 GO:0003677 | GO:0019079 GO:0006355<br>GO:0006310 GO:0006281<br>GO:0002949                          |                          | EM | 5,5   | 4e <sup>-08</sup> | 18 ±3       | 3 ±1        |
| PSME_00016380-RA | cell division cycle 48 homolog                       | AT5G03340.1 | GO:0098519 GO:0043531 GO:0016887<br>GO:0016301 GO:0009378 GO:0008134<br>GO:0005524 GO:0003724 GO:0003723<br>GO:0003678                       | GO:0019079 GO:0006355<br>GO:0006310 GO:0006281<br>GO:0002949                          |                          | NE | 12,3  | 3e <sup>-07</sup> | 1 ±0        | 11 ±3       |
| PSME_00016694-RA | polygalacturonase non-catalytic subunit JP650        | AT1G70370.1 | GO:0043531 GO:0016887 GO:0016301<br>GO:0009378 GO:0008134 GO:0005524<br>GO:0004127 GO:0003724 GO:0003723<br>GO:0003678                       | GO:0019079 GO:0006576<br>GO:0006355 GO:0006310<br>GO:0006281 GO:0006139<br>GO:0002949 |                          | EM | 3,9   | 5e <sup>-08</sup> | 2067 ±296   | 522 ±85     |
| PSME_00017230-RA | calmodulin binding                                   | AT3G58480.1 | GO:0016887 GO:0008134 GO:0005525<br>GO:0005524 GO:0003924 GO:0003724<br>GO:0003723 GO:0003678                                                | GO:0006810 GO:0006614<br>GO:0006355                                                   |                          | EM | 3,5   | 4e <sup>-08</sup> | 1258 ±259   | 356 ±38     |
| PSME_00017263-RA | asparagine synthetase                                | AT3G47340.1 | GO:0098519 GO:0043531 GO:0016887<br>GO:0016301 GO:0009378 GO:0008134<br>GO:0005524 GO:0003724 GO:0003723<br>GO:0003678                       | GO:0019079 GO:0006810<br>GO:0006355 GO:0006310<br>GO:0006281 GO:0002949<br>GO:0000723 |                          | EM | 5,8   | 2e <sup>-12</sup> | 159 ±29     | 27 ±4       |
| PSME_00017644-RA | LRR receptor serine/threonine-kinase ERL1 isoform X2 | AT5G62230.1 | GO:0033897 GO:0003723                                                                                                                        |                                                                                       |                          | EM | 3,3   | 8e <sup>-06</sup> | 205 ±23     | 61 ±13      |
| PSME_00017672-RA | high mobility group B 15 isoform X1                  | AT1G04880.1 | GO:0003723                                                                                                                                   |                                                                                       |                          | EM | 13,5  | 7e <sup>-08</sup> | 2843 ±77    | 191 ±59     |
| PSME_00018597-RA | DEAD-box ATP-dependent RNA helicase 38               | AT3G53110.1 | GO:0098519 GO:0031683 GO:0019001<br>GO:0016887 GO:0016301 GO:0005525<br>GO:0005524 GO:0004871 GO:0003924<br>GO:0003724 GO:0003723 GO:0003678 | GO:0008152 GO:0007186<br>GO:0006810 GO:0006614<br>GO:0006281 GO:0000723               |                          | EM | 2,2   | 2e <sup>-13</sup> | 108 ±8      | 50 ±4       |
| PSME_00019609-RA | von willebrand factor type A domain                  |             | GO:0098519 GO:0016887 GO:0016301<br>GO:0009378 GO:0005525 GO:0005524<br>GO:0003924 GO:0003724 GO:0003723                                     | GO:0007264 GO:0006777<br>GO:0006576 GO:0006310<br>GO:0006281 GO:0002949               | GO:0016020               | EM | 4     | 3e <sup>-05</sup> | 208 ±17     | 51 ±11      |
| PSME_00020362-RA | ubiquitin fusion degradation 1 homolog isoform X2    | AT2G21270.3 | GO:0003723                                                                                                                                   | GO:0006511 GO:0006353                                                                 |                          | NE | 61    | 2e <sup>-09</sup> | 0 ±0        | 12 ±3       |

|                  |                                                                           |             |                                                                                                                                   |                                                              |                                        |    |       |                   |             |           |
|------------------|---------------------------------------------------------------------------|-------------|-----------------------------------------------------------------------------------------------------------------------------------|--------------------------------------------------------------|----------------------------------------|----|-------|-------------------|-------------|-----------|
| PSME_00020723-RA | O-acyltransferase WSD1                                                    | AT5G53390.1 | GO:0046872 GO:0004535 GO:0003723<br>GO:0003676                                                                                    | GO:0006402                                                   | GO:0005737<br>GO:0005634               | EM | 131,5 | 1e <sup>-21</sup> | 293 ±81     | 2 ±1      |
| PSME_00021307-RA | TF PosF21                                                                 | AT2G42380.2 | GO:0098519 GO:0016887 GO:0016301<br>GO:0005525 GO:0005524 GO:0003724<br>GO:0003723 GO:0003678                                     | GO:0008152 GO:0006810<br>GO:0006614 GO:0006281<br>GO:0000723 |                                        | EM | 2,1   | 7e <sup>-66</sup> | 4571 ±155   | 2129 ±57  |
| PSME_00021865-RA | late embryogenesis abundant B19.1A                                        | AT2G40170.1 | GO:0003723                                                                                                                        |                                                              |                                        | EM | 853,2 | 2e <sup>-58</sup> | 372 ±57     | 0 ±0      |
| PSME_00023263-RA | multidrug resistance                                                      | AT3G28345.1 | GO:0042626 GO:0031683 GO:0019001<br>GO:0016887 GO:0016301 GO:0005525<br>GO:0005524 GO:0004871 GO:0003924<br>GO:0003724 GO:0003723 | GO:0055085 GO:0008152<br>GO:0007186 GO:0006810<br>GO:0006777 | GO:0016021                             | NE | 2,1   | 1e <sup>-23</sup> | 3850 ±161   | 8139 ±470 |
| PSME_00024031-RA | UF642 I-Gall-responsive 1                                                 | AT5G25460.1 | GO:0098519 GO:0016887 GO:0016301<br>GO:0009378 GO:0005525 GO:0005524<br>GO:0003924 GO:0003724 GO:0003723                          | GO:0007264 GO:0006614<br>GO:0006576 GO:0006310<br>GO:0006281 | GO:0016020                             | EM | 9,5   | 4e <sup>-56</sup> | 25047 ±2059 | 2625 ±283 |
| PSME_00024538-RA | cytochrome P450 78A7                                                      | AT5G09970.1 | GO:0003723 GO:0003676                                                                                                             |                                                              |                                        | EM | 50,2  | 1e <sup>-68</sup> | 159 ±13     | 3 ±1      |
| PSME_00024700-RA | ribonuclease 2                                                            | AT2G39780.1 | GO:0033897 GO:0003723                                                                                                             |                                                              |                                        | NE | 3     | 2e <sup>-25</sup> | 623 ±65     | 1880 ±97  |
| PSME_00024720-RA | 2-methylene-furan-3-one reductase isoform X2                              | AT1G23740.1 | GO:0016887 GO:0009378 GO:0005524<br>GO:0003724 GO:0003723                                                                         | GO:0006367 GO:0006310<br>GO:0006281                          | GO:0005672                             | EM | 45,4  | 7e <sup>-27</sup> | 117 ±16     | 2 ±1      |
| PSME_00024826-RA | REF/SRPP At3g05500                                                        | AT3G05500.1 | GO:0005524 GO:0004386 GO:0003723<br>GO:0003676                                                                                    |                                                              | GO:0070461<br>GO:0005634               | EM | 4,6   | 3e <sup>-16</sup> | 103 ±12     | 22 ±3     |
| PSME_00025196-RA | pentatricopeptide repeat-containing At3g03580                             | AT3G03580.1 | GO:0043531 GO:0016887 GO:0009378<br>GO:0008134 GO:0005524 GO:0003724<br>GO:0003723 GO:0003678                                     | GO:0019079 GO:0006355<br>GO:0006310 GO:0006281<br>GO:0002949 |                                        | EM | 2,2   | 4e <sup>-11</sup> | 293 ±19     | 131 ±12   |
| PSME_00025295-RA | glycosyltransferase At5g03795                                             | AT5G03795.1 | GO:0003723 GO:0003690                                                                                                             | GO:0006355                                                   | GO:0019031<br>GO:0005739               | EM | 10,1  | 5e <sup>-06</sup> | 1260 ±268   | 114 ±34   |
| PSME_00025764-RA | pentatricopeptide repeat-containing At1g73400 mitochondrial               | AT1G73400.1 | GO:0046983 GO:0003735 GO:0003723                                                                                                  | GO:0006412                                                   | GO:0005840<br>GO:0005622               | EM | 2,5   | 2e <sup>-16</sup> | 214 ±16     | 87 ±6     |
| PSME_00025833-RA | xyloglucan endotransglucosylase/hydrolase 7                               | AT5G65730.1 | GO:0005525 GO:0005524 GO:0005515<br>GO:0003723                                                                                    | GO:0051276 GO:0007264<br>GO:0006406                          | GO:0005737<br>GO:0005694<br>GO:0005634 | EM | 190,2 | 2e <sup>-24</sup> | 380 ±55     | 2 ±1      |
| PSME_00026159-RA | : palmitoyl-monogalactosyldiacylglycerol delta-7 desaturase chloroplastic | AT3G15850.1 | GO:0030246 GO:0016773 GO:0005524<br>GO:0004560 GO:0003723                                                                         | GO:0006396 GO:0005975<br>GO:0002682                          |                                        | EM | 2,8   | 1e <sup>-07</sup> | 41 ±4       | 15 ±2     |
| PSME_00026932-RA | phosphoenolpyruvate carboxylase 4                                         | AT1G68750.1 | GO:0008964 GO:0003723                                                                                                             | GO:0015977 GO:0006099                                        | GO:0005829                             | EM | 3,1   | 4e <sup>-10</sup> | 16 ±1       | 5 ±1      |
| PSME_00027099-RA | CBL-interacting serine/threonine- kinase 23 isoform X3                    | AT1G30270.1 | GO:0003723 GO:0003676                                                                                                             |                                                              |                                        | EM | 3     | 4e <sup>-05</sup> | 83 ±11      | 27 ±5     |
| PSME_00027997-RA | LURP-one-related 8                                                        | AT3G15810.1 | GO:0016887 GO:0005525 GO:0005524<br>GO:0003924 GO:0003724 GO:0003723                                                              | GO:0006614 GO:0006576                                        |                                        | EM | 22,3  | 2e <sup>-06</sup> | 15 ±6       | 0 ±0      |
| PSME_00028192-RA | GATA TF 22                                                                | AT5G49300.1 | GO:0033897 GO:0003723                                                                                                             |                                                              |                                        | EM | 60,9  | 2e <sup>-16</sup> | 1100 ±187   | 15 ±8     |
| PSME_00028416-RA | delta(24)-sterol reductase                                                | AT3G19820.1 | GO:0008982 GO:0008536 GO:0005524<br>GO:0005515 GO:0004674 GO:0003968<br>GO:0003723                                                | GO:0019079 GO:0016192<br>GO:0009401 GO:0006886               | GO:0030117<br>GO:0016021               | EM | 3,3   | 4e <sup>-10</sup> | 1123 ±182   | 337 ±37   |
| PSME_00028893-RA | 60S ribosomal L8                                                          | AT2G18020.1 | GO:0003735 GO:0003723                                                                                                             | GO:0002181                                                   | GO:0022625                             | NE | 100,1 | 9e <sup>-32</sup> | 1 ±0        | 95 ±19    |
| PSME_00030323-RA | notum homolog isoform X1                                                  | AT4G19420.1 | GO:0016787 GO:0005525 GO:0003746<br>GO:0003723                                                                                    | GO:0001514                                                   | GO:0005737                             | NE | 9,8   | 1e <sup>-39</sup> | 305 ±43     | 3010 ±275 |
| PSME_00030404-RA | metacaspase-9 isoform X2                                                  | AT5G04200.1 | GO:0003723                                                                                                                        |                                                              |                                        | EM | 6,2   | 4e <sup>-12</sup> | 534 ±44     | 84 ±14    |

|                  |                                                                                    |             |                                                                                                                                              |                                                                         |                          |     |                   |                   |           |            |
|------------------|------------------------------------------------------------------------------------|-------------|----------------------------------------------------------------------------------------------------------------------------------------------|-------------------------------------------------------------------------|--------------------------|-----|-------------------|-------------------|-----------|------------|
| PSME_00030551-RA | 5-methyltetrahydropteroyltriglutamate--homocysteine methyltransferase 1 isoform X4 | AT5G17920.1 | GO:0004809 GO:0003723                                                                                                                        | GO:0008033                                                              | EM                       | 3,8 | 1e <sup>-09</sup> | 681 ±59           | 177 ±30   |            |
| PSME_00030804-RA | DEAD box RNA helicase isoform 2                                                    | AT5G14610.1 | GO:0008173 GO:0003723                                                                                                                        | GO:0006396                                                              | EM                       | 6,5 | 2e <sup>-05</sup> | 14 ±3             | 2 ±1      |            |
| PSME_00031165-RA | indole-3-acetate O-methyltransferase 1                                             | AT5G55250.1 | GO:0098519 GO:0016887 GO:0016301<br>GO:0005525 GO:0005524 GO:0003924<br>GO:0003724 GO:0003723                                                | GO:0006810 GO:0006576<br>GO:0002949                                     | GO:0016020               | EM  | 246,2             | 5e <sup>-43</sup> | 242 ±47   | 1 ±0       |
| PSME_00031180-RA | ABC transporter E member 2                                                         | AT4G19210.1 | GO:0098519 GO:0043531 GO:0031683<br>GO:0019001 GO:0016887 GO:0005525<br>GO:0005524 GO:0004871 GO:0003924<br>GO:0003724 GO:0003723 GO:0003677 | GO:0030261 GO:0007186<br>GO:0007059 GO:0006614<br>GO:0002949            | GO:0009295               | NE  | 2,2               | 5e <sup>-09</sup> | 340 ±36   | 742 ±57    |
| PSME_00032223-RA | serine/arginine-rich SC35 splicing factor SCL28                                    | AT3G13570.1 | GO:0003723 GO:0003677 GO:0000166                                                                                                             | GO:0007283                                                              | GO:0016607<br>GO:0000786 | EM  | 2,7               | 8e <sup>-14</sup> | 1333 ±107 | 490 ±54    |
| PSME_00032247-RA | Os09g0400200                                                                       | AT4G39330.1 | GO:0004185 GO:0003723                                                                                                                        |                                                                         | GO:0005773               | EM  | 22,6              | 1e <sup>-08</sup> | 581 ±164  | 22 ±8      |
| PSME_00032964-RA | protease Do 7                                                                      | AT3G03380.1 | GO:0070009 GO:0008239 GO:0005524<br>GO:0005515 GO:0004252 GO:0003724<br>GO:0003723                                                           | GO:0006508                                                              |                          | NE  | 3,8               | 3e <sup>-10</sup> | 38 ±3     | 145 ±20    |
| PSME_00032965-RA | protease Do 7 isoform X2                                                           | AT3G03380.1 | GO:0070009 GO:0008239 GO:0005524<br>GO:0005515 GO:0004252 GO:0003724<br>GO:0003723                                                           | GO:0019082 GO:0016032<br>GO:0006508                                     |                          | NE  | 3,8               | 1e <sup>-28</sup> | 2909 ±185 | 10951 ±894 |
| PSME_00032966-RA | protease Do 7 isoform X1                                                           | AT3G03380.1 | GO:0070009 GO:0008239 GO:0008236<br>GO:0005524 GO:0005515 GO:0004252<br>GO:0003724 GO:0003723                                                | GO:0019087 GO:0019082<br>GO:0016032 GO:0006508                          |                          | NE  | 2,2               | 9e <sup>-10</sup> | 366 ±30   | 808 ±62    |
| PSME_00032968-RA | Cyclic nucleotide gated channel 5 isoform 1                                        | AT1G15990.1 | GO:0033897 GO:0005515 GO:0003723                                                                                                             |                                                                         |                          | NE  | 2,1               | 1e <sup>-28</sup> | 964 ±59   | 2006 ±56   |
| PSME_00033756-RA | G2/mitotic-specific cyclin-2 isoform X1                                            | AT1G76310.1 | GO:0003723 GO:0003676                                                                                                                        |                                                                         |                          | EM  | 2,3               | 2e <sup>-13</sup> | 83 ±6     | 36 ±3      |
| PSME_00033759-RA | thioredoxin reductase 1                                                            | AT2G17420.1 | GO:0003723 GO:0003676                                                                                                                        |                                                                         |                          | EM  | 2,6               | 6e <sup>-08</sup> | 338 ±35   | 129 ±21    |
| PSME_00034056-RA | omega-hydroxypalmitate O-feruloyl transferase isoform X2                           | AT1G65450.1 | GO:0016887 GO:0016787 GO:0016301<br>GO:0008134 GO:0005525 GO:0005524<br>GO:0005515 GO:0003924 GO:0003724<br>GO:0003723 GO:0003677            | GO:0019538 GO:0007264<br>GO:0006810 GO:0006355<br>GO:0002949            |                          | EM  | 690,1             | 4e <sup>-67</sup> | 3320 ±520 | 4 ±2       |
| PSME_00034347-RA | aminotransferase TAT2                                                              | AT5G53970.1 | GO:0003735 GO:0003723                                                                                                                        | GO:0006412                                                              | GO:0005840<br>GO:0005622 | EM  | 6                 | 1e <sup>-08</sup> | 284 ±19   | 46 ±12     |
| PSME_00035260-RA | TCM_016710                                                                         | AT4G19390.1 | GO:0016887 GO:0005525 GO:0005524<br>GO:0003924 GO:0003724 GO:0003723                                                                         |                                                                         | GO:0016020               | EM  | 4,2               | 2e <sup>-08</sup> | 492 ±35   | 117 ±20    |
| PSME_00035514-RA | GTP-binding nuclear Ran1A                                                          | AT5G55190.1 | GO:0031683 GO:0019001 GO:0016887<br>GO:0005525 GO:0005524 GO:0004871<br>GO:0003924 GO:0003724 GO:0003723                                     | GO:0007264 GO:0007186                                                   |                          | NE  | 2013              | 1e <sup>-33</sup> | 0 ±0      | 1341 ±457  |
| PSME_00036270-RA | myb-related 306                                                                    | AT5G57620.1 | GO:0098519 GO:0016887 GO:0016301<br>GO:0009378 GO:0005525 GO:0005524<br>GO:0003924 GO:0003724 GO:0003723                                     | GO:0007264 GO:0006777<br>GO:0006614 GO:0006310<br>GO:0006281            | GO:0016020               | EM  | 9,3               | 8e <sup>-09</sup> | 181 ±26   | 18 ±4      |
| PSME_00036372-RA | Senescence/dehydration-associated                                                  |             | GO:0070009 GO:0008239 GO:0005524<br>GO:0005515 GO:0004252 GO:0003724<br>GO:0003723 GO:0003677                                                | GO:0016032 GO:0006508                                                   | GO:0016021               | EM  | 7,4               | 6e <sup>-05</sup> | 46 ±8     | 6 ±2       |
| PSME_00036602-RA | SET domain 35                                                                      | AT1G26760.1 | GO:0098519 GO:0016887 GO:0016301<br>GO:0009378 GO:0005525 GO:0005524<br>GO:0003924 GO:0003724 GO:0003723                                     | GO:0007264 GO:0006777<br>GO:0006576 GO:0006310<br>GO:0006281 GO:0002949 | GO:0016020               | EM  | 14,7              | 6e <sup>-12</sup> | 54 ±9     | 3 ±1       |

|                  |                                                                     |             |                                                                                                               |                                                                               |    |       |                   |             |           |
|------------------|---------------------------------------------------------------------|-------------|---------------------------------------------------------------------------------------------------------------|-------------------------------------------------------------------------------|----|-------|-------------------|-------------|-----------|
| PSME_00036962-RA | DEAD-box ATP-dependent RNA helicase 38                              | AT3G53110.1 | GO:0016779 GO:0003723                                                                                         | GO:0006396                                                                    | EM | 2     | 5e <sup>-14</sup> | 425 ±20     | 208 ±15   |
| PSME_00037269-RA | germin 2-1                                                          | AT4G14630.1 | GO:0004518 GO:0003723 GO:0003677                                                                              |                                                                               | EM | 13,1  | 9e <sup>-09</sup> | 144 ±42     | 10 ±2     |
| PSME_00038561-RA | phosphoglycerate kinase                                             | AT1G79550.1 | GO:0003735 GO:0003723                                                                                         | GO:0006412 GO:0005840                                                         | EM | 5,8   | 1e <sup>-04</sup> | 255 ±30     | 42 ±27    |
| PSME_00038590-RA | Pre-mRNA cleavage complex 2 Pcf11 isoform 3                         | AT3G22550.1 | GO:0004540 GO:0003723                                                                                         | GO:0008033 GO:0006379 GO:0006364 GO:00030677 GO:0000172                       | EM | 14,7  | 7e <sup>-10</sup> | 54 ±14      | 3 ±1      |
| PSME_00039496-RA | serine/threonine- phosphatase 6 regulatory ankyrin repeat subunit C | AT3G28880.1 | GO:0045182 GO:0005525 GO:0005506 GO:0005089 GO:0003746 GO:0003723                                             | GO:0006417 GO:0001514 GO:0005737                                              | EM | 64,3  | 1e <sup>-07</sup> | 30 ±8       | 0 ±0      |
| PSME_00040631-RA | RING-H2 finger ATL74                                                | AT3G10910.1 | GO:0003723                                                                                                    |                                                                               | EM | 4,2   | 1e <sup>-07</sup> | 130 ±14     | 30 ±6     |
| PSME_00041065-RA | SRG1 isoform X1                                                     | AT3G21420.1 | GO:0043531 GO:0016887 GO:0016301 GO:0009378 GO:0005524 GO:0003724 GO:0003723 GO:0003678                       | GO:0019079 GO:0006310 GO:0006281 GO:0002949                                   | EM | 21,4  | 2e <sup>-14</sup> | 859 ±94     | 37 ±10    |
| PSME_00041471-RA | dnaJ homolog sub B member 6 isoform X3                              | AT1G56300.1 | GO:0003723                                                                                                    |                                                                               | EM | 3     | 2e <sup>-11</sup> | 833 ±37     | 277 ±38   |
| PSME_00041502-RA | pectate lyase 8                                                     | AT4G13710.1 | GO:0045182 GO:0005525 GO:0003746 GO:0003723                                                                   | GO:0016192 GO:0006886 GO:0006417 GO:0001514 GO:0000372 GO:00030529 GO:0005737 | EM | 6,1   | 6e <sup>-15</sup> | 142 ±29     | 23 ±2     |
| PSME_00041701-RA | LURP-one-related 8 isoform X2                                       | AT2G38640.1 | GO:0005525 GO:0003724 GO:0003723                                                                              | GO:0007264                                                                    | EM | 117,4 | 6e <sup>-41</sup> | 148 ±21     | 1 ±1      |
| PSME_00041732-RA | acyl-coenzyme A thioesterase 13                                     | AT2G29590.1 | GO:0043531 GO:0016887 GO:0016787 GO:0009378 GO:0008134 GO:0005524 GO:0003724 GO:0003723 GO:0003678 GO:0003677 | GO:0019079 GO:0006355 GO:0006310 GO:0006281 GO:0002949                        | EM | 4,4   | 1e <sup>-05</sup> | 36 ±8       | 8 ±2      |
| PSME_00041971-RA | purple acid phosphatase 23                                          | AT3G07130.1 | GO:0043565 GO:0016779 GO:0003723 GO:0003700                                                                   | GO:0006396 GO:0006355 GO:0006351                                              | EM | 3     | 1e <sup>-04</sup> | 1796 ±368   | 584 ±120  |
| PSME_00042006-RA | receptor kinase At5g47070                                           | AT5G03320.1 | GO:0003723 GO:0003676                                                                                         |                                                                               | EM | 9,9   | 2e <sup>-08</sup> | 31 ±5       | 3 ±1      |
| PSME_00043286-RA | intracellular ribonuclease LX                                       | AT2G02990.1 | GO:0033897 GO:0003723                                                                                         |                                                                               | NE | 7     | 6e <sup>-08</sup> | 4 ±1        | 25 ±4     |
| PSME_00043623-RA | QWRF motif-containing 2                                             | AT4G30710.1 | GO:0016887 GO:0009378 GO:0008134 GO:0005524 GO:0003724 GO:0003723 GO:0003678                                  | GO:0006355 GO:0006310 GO:0006281 GO:0002949                                   | EM | 17,1  | 1e <sup>-07</sup> | 14 ±4       | 1 ±0      |
| PSME_00044624-RA | glutelin type-A 1                                                   | AT2G28680.1 | GO:0016887 GO:0009378 GO:0008134 GO:0005524 GO:0003724 GO:0003723 GO:0003678                                  | GO:0006355 GO:0006310 GO:0006281 GO:0002949                                   | EM | 15,1  | 2e <sup>-65</sup> | 28285 ±4110 | 1855 ±134 |
| PSME_00046060-RA | knotted 1-binding                                                   | AT5G03050.1 | GO:0003723                                                                                                    | GO:0070206                                                                    | NE | 6,2   | 7e <sup>-10</sup> | 11 ±3       | 68 ±6     |
| PSME_00046806-RA | mitochondrial chaperone BCS1-B                                      | AT3G28580.1 | GO:0016887 GO:0009378 GO:0005524 GO:0003724 GO:0003723                                                        | GO:0006310 GO:0006281                                                         | NE | 48    | 3e <sup>-32</sup> | 53 ±8       | 2727 ±473 |
| PSME_00048125-RA | isoform 1                                                           | AT3G51290.1 | GO:0003723                                                                                                    | GO:0006777                                                                    | EM | 17,4  | 3e <sup>-17</sup> | 4883 ±210   | 265 ±69   |
| PSME_00048243-RA | RNA-binding (RRM/RBD/RNP motifs)                                    | AT1G14340.1 | GO:0003723 GO:0003676                                                                                         |                                                                               | NE | 4,5   | 1e <sup>-33</sup> | 1083 ±114   | 4931 ±348 |
| PSME_00048431-RA | Os03g0151800                                                        | AT5G03340.1 | GO:0043531 GO:0016887 GO:0009378 GO:0005524 GO:0003724 GO:0003723 GO:0003678                                  | GO:0019079 GO:0006310 GO:0006281 GO:0002949                                   | NE | 18,4  | 4e <sup>-06</sup> | 1 ±1        | 30 ±9     |
| PSME_00048472-RA | cytochrome P450 CYP736A12                                           | AT3G48280.1 | GO:0008173 GO:0003723                                                                                         | GO:0006396                                                                    | EM | 204,1 | 6e <sup>-46</sup> | 51 ±8       | 0 ±0      |
| PSME_00048657-RA | glucan endo-1,3-beta-glucosidase A6                                 | AT3G07320.1 | GO:0003723                                                                                                    |                                                                               | EM | 4,3   | 3e <sup>-06</sup> | 68 ±15      | 15 ±3     |

|                  |                                                                           |             |                                                                                                                                                            |                                                                         |    |       |                   |             |             |
|------------------|---------------------------------------------------------------------------|-------------|------------------------------------------------------------------------------------------------------------------------------------------------------------|-------------------------------------------------------------------------|----|-------|-------------------|-------------|-------------|
| PSME_00048908-RA | pectate lyase 8 isoform X1                                                | AT3G07010.1 | GO:0003723                                                                                                                                                 |                                                                         | EM | 1143  | 4e <sup>-55</sup> | 323 ±82     | 0 ±0        |
| PSME_00050702-RA | Os05g0171900                                                              | AT1G80160.1 | GO:0003723                                                                                                                                                 |                                                                         | NE | 32,3  | 9e <sup>-15</sup> | 6 ±2        | 228 ±38     |
| PSME_00050753-RA | SOMBRERO                                                                  | AT1G79580.1 | GO:0003723                                                                                                                                                 |                                                                         | EM | 7,9   | 1e <sup>-17</sup> | 13815 ±2082 | 1706 ±290   |
| PSME_00051837-RA | actin                                                                     | AT5G09810.1 | GO:0098519 GO:0043531 GO:0016887<br>GO:0016787 GO:0016301 GO:0009378<br>GO:0008134 GO:0005524 GO:0003724<br>GO:0003723 GO:0003678 GO:0003677               | GO:0019079 GO:0006355<br>GO:0006310 GO:0006281<br>GO:0002949            | EM | 3,5   | 5e <sup>-33</sup> | 490 ±31     | 138 ±10     |
| PSME_00051945-RA | 5-methyltetrahydropteroyltriglutamate--<br>homocysteine methyltransferase | AT3G03780.1 | GO:0008897 GO:0003723 GO:0003676<br>GO:0000287                                                                                                             |                                                                         | EM | 5,7   | 2e <sup>-07</sup> | 16 ±2       | 3 ±1        |
| PSME_00052130-RA | transporter arsB                                                          | AT1G02260.1 | GO:0003723                                                                                                                                                 |                                                                         | EM | 3,8   | 3e <sup>-11</sup> | 75 ±6       | 20 ±3       |
| PSME_00052451-RA | long-chain-alcohol oxidase FAO2                                           | AT3G23410.1 | GO:0033897 GO:0003723                                                                                                                                      |                                                                         | EM | 15,8  | 1e <sup>-12</sup> | 20 ±3       | 1 ±0        |
| PSME_00052605-RA | xyloglucan endotransglucosylase/hydrolase 9                               | AT4G03210.1 | GO:0005524 GO:0004386 GO:0003723<br>GO:0003676                                                                                                             | GO:0005634                                                              | EM | 4,2   | 9e <sup>-06</sup> | 389 ±76     | 90 ±20      |
| PSME_00052678-RA | mitochondrial chaperone BCS1-B                                            | AT3G28510.1 | GO:0016887 GO:0009378 GO:0008918<br>GO:0005524 GO:0003724 GO:0003723<br>GO:0003677                                                                         | GO:0009103 GO:0006313<br>GO:0006310 GO:0006281                          | NE | 3,1   | 3e <sup>-08</sup> | 1625 ±280   | 5142 ±516   |
| PSME_00052764-RA | histone H2AX                                                              | AT1G54690.1 | GO:0098519 GO:0043531 GO:0016887<br>GO:0016301 GO:0009378 GO:0008134<br>GO:0005524 GO:0003724 GO:0003723<br>GO:0003678                                     | GO:0019079 GO:0006576<br>GO:0006355 GO:0006310<br>GO:0006281 GO:0002949 | EM | 2,1   | 1e <sup>-40</sup> | 55932 ±2086 | 26005 ±1011 |
| PSME_00053348-RA | endoribonuclease Dicer homolog 1 isoform<br>X1                            | AT3G20420.1 | GO:0004525 GO:0003723                                                                                                                                      | GO:0006396                                                              | NE | 4,2   | 5e <sup>-11</sup> | 212 ±16     | 890 ±128    |
| PSME_00054009-RA | uninformative                                                             |             | GO:0003723                                                                                                                                                 |                                                                         | EM | 20,9  | 1e <sup>-18</sup> | 12 ±2       | 0 ±0        |
| PSME_00054332-RA | Cytochrome P450                                                           | AT2G45550.1 | GO:0003723                                                                                                                                                 | GO:0005743                                                              | EM | 31,1  | 4e <sup>-12</sup> | 10 ±3       | 0 ±0        |
| PSME_00055130-RA | glucan endo-1,3-beta-glucosidase 5                                        | AT5G58480.1 | GO:0004521 GO:0003723                                                                                                                                      |                                                                         | EM | 4,2   | 3e <sup>-17</sup> | 143 ±9      | 33 ±5       |
| PSME_00056488-RA | subtilisin protease                                                       | AT3G14240.1 | GO:0008173 GO:0008168 GO:0003723                                                                                                                           | GO:0006396 GO:0016021                                                   | EM | 216,7 | 5e <sup>-24</sup> | 62 ±16      | 0 ±0        |
| PSME_00056929-RA | alpha-1,4-glucan- synthase                                                | AT3G02230.1 | GO:0098519 GO:0043531 GO:0016887<br>GO:0016787 GO:0016740 GO:0016301<br>GO:0009378 GO:0008134 GO:0005524<br>GO:0003724 GO:0003723 GO:0003678<br>GO:0003677 | GO:0019079 GO:0006576<br>GO:0006355 GO:0006310<br>GO:0006281 GO:0002949 | EM | 2,8   | 6e <sup>-21</sup> | 2010 ±104   | 707 ±57     |
| PSME_00056941-RA | mitochondrial chaperone BCS1                                              | AT2G46620.1 | GO:0016887 GO:0009378 GO:0005524<br>GO:0003724 GO:0003723                                                                                                  | GO:0006310 GO:0006281                                                   | NE | 2,1   | 3e <sup>-17</sup> | 310 ±15     | 660 ±40     |
| PSME_00057055-RA | : H/ACA ribonucleo complex subunit 4                                      | AT3G57150.1 | GO:0009982 GO:0003723                                                                                                                                      | GO:0006396 GO:0001522                                                   | EM | 2,5   | 6e <sup>-31</sup> | 22349 ±1236 | 8816 ±486   |
