# Supplementary material for: Cytological, Biochemical and Molecular Events of the Embryogenic State in Douglas-fir (Pseudotsuga menziesii [Mirb.])
Source: PubMed Central journal article supplement (PMC6403139; doi:10.3389/fpls.2019.00118), 2019-02-28
Supplement: Table_4.pdf [file Table_4.pdf]

**Supplementary Table S4.** Characteristics of significantly differentially expressed proteins (ID Douglas-fir) in isogenic embryonal mass (EM) and non-embryogenic callus (NEC) of three genotypes (SD4-8, TD15-1 and TD17-1) of Douglas-fir after two weeks of proliferation. Functional annotation (Function), and GO ontologies (biological process) were obtained from Blast2GO and PineRefSeq. *Arabidopsis thaliana* orthologies (At\_orthologs and At\_protein) were obtained from Pathway Studio. FDR-adjusted p-value for differential expression were obtained from the limma R package for each genotype before mean calculations. FC: fold-change. Expr: trend of expression relative to fold-change. Mean Padj: mean of the adjusted P-value obtained for each genotype.

| ID Douglas-fir   | Function                                                              | At_ortholog | At_protein  | Biological process                                     | FC  | Expr. | Mean Padj.             |
|------------------|-----------------------------------------------------------------------|-------------|-------------|--------------------------------------------------------|-----|-------|------------------------|
| PSME_00003908-RA | 1,2-dihydroxy-3-keto-5-methylthiopentene dioxxygenase 2               | AT4G14710   |             | GO:0006555 GO:0055114                                  | 0,3 | NEC   | 9,38 10 <sup>-04</sup> |
| PSME_00017765-RA | 1,4-dihydroxy-2-naphthoyl-CoA synthase, peroxisomal isoform X1        | AT1G60550   | ECHID       |                                                        | 0,4 | NEC   | 4,31 10 <sup>-03</sup> |
| PSME_00029162-RA | 12-oxophytodienoate reductase 2-like isoform X1                       | AT1G76690   | OPR2        | GO:0055114 GO:0009611                                  | 3,2 | EM    | 1,54 10 <sup>-04</sup> |
| PSME_00046623-RA | 12-oxophytodienoate reductase 7                                       | AT2G06050   | OPR3        | GO:0009620 GO:0055114 GO:0009611 GO:0009695            | 0,3 | NEC   | 6,16 10 <sup>-06</sup> |
| PSME_00005541-RA | 14-3-3-like protein D                                                 | AT1G26480   | GRF12       |                                                        | 0,8 | NEC   | 2,16 10 <sup>-02</sup> |
| PSME_00037344-RA | 17.6 kDa class I heat shock protein-like                              | AT1G53540   | AT1G53540.1 | GO:0009408                                             | 0,1 | NEC   | 1,68 10 <sup>-04</sup> |
| PSME_00023023-RA | 2,3-bisphosphoglycerate-independent phosphoglycerate mutase           | AT1G09780   | iPGAM1      | GO:0046686 GO:0006096 GO:0009409 GO:0009555 GO:0006007 | 1,3 | EM    | 1,62 10 <sup>-02</sup> |
| PSME_00010871-RA | 2,3-bisphosphoglycerate-independent phosphoglycerate mutase, putative | AT3G30841   |             | GO:0008152                                             | 2,6 | EM    | 3,15 10 <sup>-03</sup> |
| PSME_00051006-RA | 24-methylene lophenol C-24 methyltransferase                          | AT1G20330   | SMT2        | GO:0010051 GO:0032259 GO:0016126                       | 2,0 | EM    | 7,08 10 <sup>-03</sup> |
| PSME_00019628-RA | 26S proteasome non-ATPase regulatory subunit 5                        | AT3G15180   | AT3G15180.2 |                                                        | 1,4 | EM    | 1,38 10 <sup>-02</sup> |
| PSME_00042587-RA | 2-alkenal reductase (NADP(+)-dependent)-like                          | AT5G16970   | AER         | GO:0006979 GO:0046686 GO:0055114                       | 0,1 | NEC   | 2,50 10 <sup>-05</sup> |
| PSME_00023357-RA | 2-hydroxyacyl-CoA lyase                                               | AT5G17380   | AT5G17380.1 |                                                        | 0,5 | NEC   | 3,74 10 <sup>-03</sup> |
| PSME_00024224-RA | 2-methylene-furan-3-one reductase-like                                | AT1G23740   | AOR         | GO:0055114 GO:0009409                                  | 0,2 | NEC   | 2,41 10 <sup>-05</sup> |
| PSME_00028204-RA | 3-demethylubiquinone-9 3-methyltransferase domain protein             | AT5G48480   | AT5G48480.1 |                                                        | 3,1 | EM    | 1,66 10 <sup>-05</sup> |
| PSME_00005757-RA | 3-ketoacyl-CoA reductase 1 isoform 1                                  | AT1G67730   | KCR1        | GO:0042335 GO:0055114 GO:0009790                       | 1,7 | EM    | 2,06 10 <sup>-03</sup> |
| PSME_00003827-RA | 3-ketoacyl-CoA thiolase 2, peroxisomal                                | AT2G33150   | PKT3        | GO:0006635 GO:0009695 GO:0009611                       | 1,4 | EM    | 1,30 10 <sup>-02</sup> |
| PSME_00053512-RA | 3-oxo-Delta(4,5)-steroid 5-beta-reductase                             | AT4G24220   | VEP1        | GO:0010051 GO:0009611 GO:0055114                       | 0,4 | NEC   | 6,78 10 <sup>-03</sup> |
| PSME_00020743-RA | 3-phosphoshikimate 1-carboxyvinyltransferase 2                        | AT2G45300   |             | GO:0009073                                             | 0,3 | NEC   | 1,71 10 <sup>-05</sup> |
| PSME_00018601-RA | 40S ribosomal protein S25-2-like                                      | AT2G21580   | AT2G21580.1 | GO:0006412                                             | 1,6 | EM    | 5,97 10 <sup>-03</sup> |
| PSME_00013554-RA | 4-alpha-glucanotransferase DPE2 isoform X2                            | AT2G40840   | DPE2        |                                                        | 2,6 | EM    | 3,65 10 <sup>-07</sup> |
| PSME_00006219-RA | 4-coumarate--CoA ligase-like 7                                        | AT4G05160   | AT4G05160.1 | GO:0009695                                             | 3,8 | EM    | 6,69 10 <sup>-04</sup> |
| PSME_00034041-RA | 5-methyltetrahydropteroyltriglutamate--homocysteine methyltransferase | AT5G17920   | ATMS1       | GO:0009651 GO:0032259 GO:0046686 GO:0009086            | 2,8 | EM    | 1,39 10 <sup>-03</sup> |
| PSME_00053040-RA | 60S ribosomal L12-like protein                                        | AT5G60670   | AT5G60670.1 | GO:0006412 GO:0000027 GO:0042254                       | 1,3 | EM    | 1,12 10 <sup>-02</sup> |
| PSME_00006747-RA | 60S ribosomal protein L15-1                                           | AT4G16720   | AT4G16720.1 | GO:0006412                                             | 1,5 | EM    | 7,69 10 <sup>-03</sup> |
| PSME_00002291-RA | 60S ribosomal protein L27a-3                                          | AT1G70600   |             | GO:0006412                                             | 1,5 | EM    | 6,35 10 <sup>-03</sup> |
| PSME_00052545-RA | 60S ribosomal protein L35                                             | AT5G02610   | AT5G02610.2 | GO:0006412 GO:0042254                                  | 1,6 | EM    | 8,66 10 <sup>-03</sup> |
| PSME_00003145-RA | 60S ribosomal protein L4                                              | AT3G09630   | SAC56       | GO:0002181 GO:0006412                                  | 1,2 | EM    | 1,89 10 <sup>-02</sup> |
| PSME_00005856-RA | 60S ribosomal protein L8                                              | AT4G36130   |             | GO:0006412                                             | 2,0 | EM    | 5,67 10 <sup>-05</sup> |
| PSME_00013038-RA | 66 kDa stress protein isoform X1                                      | AT3G18060   | AT3G18060.1 |                                                        | 2,5 | EM    | 1,70 10 <sup>-04</sup> |

|                  |                                                                                 |           |             |                                                                                                       |      |     |                        |
|------------------|---------------------------------------------------------------------------------|-----------|-------------|-------------------------------------------------------------------------------------------------------|------|-----|------------------------|
| PSME_00016643-RA | 8-hydroxygeraniol dehydrogenase-like                                            | AT3G19450 | ATCAD4      | GO:0009809 GO:0055114 GO:0080167                                                                      | 0,6  | NEC | 5,58 10 <sup>-04</sup> |
| PSME_00015981-RA | ABC transporter F family member 1-like                                          | AT5G60790 | ABCF1       | GO:0006810                                                                                            | 1,6  | EM  | 6,77 10 <sup>-04</sup> |
| PSME_00045612-RA | ABC transporter F family member 4-like                                          | AT3G54540 | ABCF4       | GO:0006810                                                                                            | 1,9  | EM  | 2,35 10 <sup>-05</sup> |
| PSME_00019197-RA | acid phosphatase 1-like                                                         | AT4G29260 | AT4G29260.1 |                                                                                                       | 2,3  | EM  | 5,92 10 <sup>-04</sup> |
| PSME_00007485-RA | actin                                                                           | AT5G09810 | ACT7        | GO:0051301 GO:0009845 GO:0009611 GO:0048364 GO:0007010<br>GO:0009416 GO:0009733                       | 5,4  | EM  | 2,07 10 <sup>-05</sup> |
| PSME_00008062-RA | actin-depolymerizing factor 7-like                                              | AT4G00680 | ADF8        |                                                                                                       | 1,6  | EM  | 1,96 10 <sup>-04</sup> |
| PSME_00011991-RA | actin-like                                                                      | AT3G12110 | ACT11       | GO:0030036                                                                                            | 6,0  | EM  | 1,21 10 <sup>-07</sup> |
| PSME_00044995-RA | activator of 90 kDa heat shock protein ATPase homolog                           | AT3G12050 | AT3G12050.1 | GO:0006950                                                                                            | 1,8  | EM  | 3,41 10 <sup>-03</sup> |
| PSME_00009588-RA | acyl-CoA-binding domain-containing protein 4-like isoform X2                    | AT3G05420 | ACBP4       | GO:0009723 GO:0006869 GO:0009416 GO:0009753                                                           | 1,9  | EM  | 5,14 10 <sup>-04</sup> |
| PSME_00004950-RA | Adenosine kinase 2                                                              | AT5G03300 | ADK2        | GO:0016032 GO:0006166 GO:0016310                                                                      | 1,8  | EM  | 1,16 10 <sup>-07</sup> |
| PSME_00001927-RA | alanine aminotransferase 2                                                      | AT1G72330 |             | GO:0009058                                                                                            | 13,8 | EM  | 3,88 10 <sup>-06</sup> |
| PSME_00001072-RA | alcohol dehydrogenase-like                                                      | AT1G77120 | ADH1        | GO:0009414 GO:0046686 GO:0009737 GO:0009651 GO:0009744<br>GO:0006970 GO:0009409 GO:0055114 GO:0042542 | 0,3  | NEC | 1,23 10 <sup>-06</sup> |
| PSME_00035677-RA | aldehyde dehydrogenase family 2 member C4 isoform X2                            | AT3G48000 | ALDH2B4     | GO:0055114 GO:0046686                                                                                 | 0,2  | NEC | 1,63 10 <sup>-02</sup> |
| PSME_00052443-RA | allene oxide synthase                                                           | AT5G42650 | AOS         | GO:0016125 GO:0009611 GO:0009695 GO:0050832 GO:0009753<br>GO:0006952 GO:0031407 GO:0009620 GO:0055114 | 0,4  | NEC | 5,40 10 <sup>-03</sup> |
| PSME_00008870-RA | allene oxide synthase, chloroplastic-like                                       | AT5G42650 | AOS         | GO:0031407 GO:0009620 GO:0006952 GO:0055114 GO:0050832<br>GO:0009753 GO:0009695 GO:0016125 GO:0009611 | 0,1  | NEC | 2,37 10 <sup>-06</sup> |
| PSME_00033948-RA | alpha,alpha-trehalose-phosphate synthase                                        | AT4G17770 | TPS5        | GO:0005992                                                                                            | 0,5  | NEC | 1,69 10 <sup>-03</sup> |
| PSME_00016742-RA | alpha-1,4 glucan phosphorylase L isozyme, chloroplastic/amyloplastic            | AT3G29320 | PHS1        | GO:0009414 GO:0009266                                                                                 | 0,4  | NEC | 8,41 10 <sup>-03</sup> |
| PSME_00046007-RA | alpha-1,4-glucan-protein synthase                                               | AT3G08900 | RGP3        | GO:0071555 GO:0030244 GO:0033356 GO:0009832                                                           | 1,4  | EM  | 4,34 10 <sup>-03</sup> |
| PSME_00009571-RA | alpha-L-arabinofuranosidase 1                                                   | AT3G10740 | ASD1        | GO:0045493 GO:0046373                                                                                 | 0,3  | NEC | 4,42 10 <sup>-07</sup> |
| PSME_00039135-RA | alpha-soluble NSF attachment protein-like                                       | AT3G56190 | ALPHA-SNAP2 | GO:0006886                                                                                            | 1,5  | EM  | 4,54 10 <sup>-03</sup> |
| PSME_00027843-RA | amidase 1-like isoform X1                                                       | AT3G17970 | TOC64-III   | GO:0015031                                                                                            | 1,5  | EM  | 1,52 10 <sup>-03</sup> |
| PSME_00048866-RA | aminoacylase-1 isoform X2                                                       | AT4G38220 | AQI         |                                                                                                       | 0,6  | NEC | 1,23 10 <sup>-04</sup> |
| PSME_00001199-RA | anamorsin homolog                                                               | AT5G18400 | DRE2        | GO:0016226                                                                                            | 0,1  | NEC | 3,89 10 <sup>-03</sup> |
| PSME_00021228-RA | anthocyanidin reductase                                                         | AT1G61720 | BAN         | GO:0055114 GO:0009813                                                                                 | 0,2  | NEC | 9,88 10 <sup>-05</sup> |
| PSME_00046128-RA | anthocyanidin reductase                                                         | AT5G42800 | DFR         | GO:0055114                                                                                            | 0,2  | NEC | 6,25 10 <sup>-04</sup> |
| PSME_00000575-RA | anthranilate synthase alpha subunit 2, chloroplastic isoform X2                 | AT2G29690 | ASA2        | GO:0009073 GO:0009058                                                                                 | 1,3  | EM  | 1,09 10 <sup>-02</sup> |
| PSME_00001853-RA | apoptosis-inducing factor homolog B-like                                        | AT3G44190 | AT3G44190.1 | GO:0055114                                                                                            | 6,2  | EM  | 2,74 10 <sup>-03</sup> |
| PSME_00009870-RA | aspartate aminotransferase, chloroplastic                                       | AT4G31990 | ASP5        | GO:0009409 GO:0009058 GO:0046686 GO:0006520                                                           | 1,3  | EM  | 8,40 10 <sup>-03</sup> |
| PSME_00052836-RA | aspartic proteinase nepenthesin-1-like                                          | AT3G25700 |             |                                                                                                       | 9,0  | EM  | 1,77 10 <sup>-06</sup> |
| PSME_00007040-RA | aspartic proteinase nepenthesin-2                                               | AT3G25700 |             |                                                                                                       | 6,0  | EM  | 3,79 10 <sup>-05</sup> |
| PSME_00035372-RA | ATP sulfurylase 2                                                               | AT1G19920 | APS2        |                                                                                                       | 2,2  | EM  | 6,46 10 <sup>-03</sup> |
| PSME_00020216-RA | ATPase 1, plasma membrane-type                                                  | AT1G80660 | HA9         | GO:0015992 GO:0006754                                                                                 | 2,9  | EM  | 4,13 10 <sup>-06</sup> |
| PSME_00016475-RA | ATPase, AAA domain containing protein                                           |           |             |                                                                                                       | 0,4  | NEC | 7,95 10 <sup>-03</sup> |
| PSME_00013241-RA | ATP-dependent 6-phosphofructokinase 3-like                                      | AT5G61580 | PFK4        | GO:0006002 GO:0006096                                                                                 | 0,7  | NEC | 1,22 10 <sup>-02</sup> |
| PSME_00000476-RA | ATP-dependent chaperone ClpB                                                    | AT1G74310 | HSP101      | GO:0009408 GO:0009644 GO:0019538 GO:0042542                                                           | 0,2  | NEC | 2,39 10 <sup>-06</sup> |
| PSME_00000131-RA | ATP-dependent Clp protease ATP-binding subunit clpA homolog CD4B, chloroplastic | AT5G50920 | CLPC1       | GO:0045037 GO:0009658 GO:0009735                                                                      | 1,7  | EM  | 3,15 10 <sup>-03</sup> |
| PSME_00040415-RA | ATP-dependent RNA helicase-like protein DB10                                    | AT5G14610 | AT5G14610.1 |                                                                                                       | 2,5  | EM  | 8,08 10 <sup>-04</sup> |

|                  |                                                                                                  |           |             |                                                                   |     |     |                        |
|------------------|--------------------------------------------------------------------------------------------------|-----------|-------------|-------------------------------------------------------------------|-----|-----|------------------------|
| PSME_00047423-RA | auxin-repressed 12.5 kDa protein-like                                                            | AT1G28330 | DYL1        | GO:0009744                                                        | 0,2 | NEC | 7,35 10 <sup>-04</sup> |
| PSME_00044312-RA | beta-adaptin-like protein A                                                                      | AT5G11490 | AT5G11490.2 | GO:0016192 GO:0006886                                             | 1,9 | EM  | 1,98 10 <sup>-03</sup> |
| PSME_00013828-RA | beta-adaptin-like protein C                                                                      | AT4G23460 | AT4G23460.1 | GO:0006886 GO:0016192                                             | 1,2 | EM  | 1,28 10 <sup>-02</sup> |
| PSME_00023147-RA | beta-D-xylosidase 1-like                                                                         | AT5G64570 | XYL4        | GO:0045493 GO:0005975                                             | 0,2 | NEC | 1,07 10 <sup>-02</sup> |
| PSME_00041230-RA | beta-xylosidase/alpha-L-arabinofuranosidase 2                                                    | AT5G64570 | XYL4        | GO:0005975 GO:0045493                                             | 0,3 | NEC | 2,86 10 <sup>-04</sup> |
| PSME_00031787-RA | bifunctional 3-dehydroquinate dehydratase/shikimate dehydrogenase, chloroplastic isoform X1      | AT3G06350 | MEE32       | GO:0055114 GO:0009073 GO:0009793                                  | 0,6 | NEC | 6,62 10 <sup>-03</sup> |
| PSME_00029904-RA | bifunctional aspartate aminotransferase and glutamate/aspartate-prephenate aminotransferase-like | AT2G22250 | AAT         | GO:0009094 GO:0009793                                             | 0,5 | NEC | 5,95 10 <sup>-03</sup> |
| PSME_00007495-RA | bifunctional epoxide hydrolase 2                                                                 | AT3G51000 | AT3G51000.1 |                                                                   | 0,5 | NEC | 4,35 10 <sup>-03</sup> |
| PSME_00012694-RA | bifunctional glutamate/proline--tRNA ligase-like isoform X2                                      | AT3G62120 | AT3G62120.1 | GO:0006418 GO:0006433                                             | 1,4 | EM  | 1,47 10 <sup>-02</sup> |
| PSME_00031912-RA | bifunctional L-3-cyanoalanine synthase/cysteine synthase 2, mitochondrial isoform X1             | AT3G61440 | CYSC1       | GO:0006955 GO:0080147 GO:0019500 GO:0006535                       | 0,3 | NEC | 1,71 10 <sup>-03</sup> |
| PSME_00035279-RA | bifunctional L-3-cyanoalanine synthase/cysteine synthase 2, mitochondrial isoform X1             | AT3G61440 | CYSC1       | GO:0080147 GO:0006955 GO:0006535 GO:0019500                       | 0,4 | NEC | 4,20 10 <sup>-05</sup> |
| PSME_00022884-RA | cellulose synthase-interactive protein 1                                                         | AT2G22125 | CSI1        | GO:0030244                                                        | 2,2 | EM  | 1,48 10 <sup>-02</sup> |
| PSME_00039185-RA | calcium-dependent protein kinase 3                                                               | AT5G12180 | CPK17       | GO:0046777 GO:0006468 GO:0009738 GO:0035556 GO:0018105            | 0,7 | NEC | 7,60 10 <sup>-03</sup> |
| PSME_00033520-RA | calcium-transporting ATPase 1, plasma membrane-type                                              | AT4G37640 | ACA2        | GO:0006810 GO:0070588                                             | 1,4 | EM  | 8,55 10 <sup>-03</sup> |
| PSME_00001231-RA | callose synthase 10                                                                              | AT2G36850 | GSL8        | GO:0006075 GO:0071555 GO:0009555 GO:0008360                       | 2,5 | EM  | 7,44 10 <sup>-04</sup> |
| PSME_00010506-RA | cathepsin B-like                                                                                 | AT1G02305 | AT1G02305.1 | GO:0006508 GO:0050790 GO:0006952 GO:0051603                       | 2,5 | EM  | 5,27 10 <sup>-04</sup> |
| PSME_00047559-RA | cationic peroxidase 1-like                                                                       | AT5G05340 | PRX52       | GO:0006979 GO:0042744 GO:0055114 GO:0009809                       | 0,2 | NEC | 9,05 10 <sup>-03</sup> |
| PSME_00000477-RA | chaperone protein ClpB1                                                                          | AT1G74310 | HSP101      | GO:0009408 GO:0042542 GO:0019538 GO:0009644                       | 0,2 | NEC | 9,04 10 <sup>-05</sup> |
| PSME_00000058-RA | chaperonin 60 subunit beta 2, chloroplastic isoform X2                                           | AT3G13470 | Cpn60beta2  | GO:0061077 GO:0006458 GO:0007005                                  | 0,6 | NEC | 2,26 10 <sup>-03</sup> |
| PSME_00046974-RA | chorismate mutase 1, chloroplastic                                                               | AT3G29200 | CM1         | GO:0055114 GO:0098869 GO:0046417 GO:0009073                       | 0,4 | NEC | 9,82 10 <sup>-04</sup> |
| PSME_00032578-RA | cinnamoyl-CoA reductase 1-like                                                                   | AT5G19440 | AT5G19440.1 |                                                                   | 0,2 | NEC | 2,11 10 <sup>-05</sup> |
| PSME_00006186-RA | citrate synthase, mitochondrial                                                                  | AT2G44350 | ATCS        | GO:0046686 GO:0006099                                             | 0,7 | NEC | 2,08 10 <sup>-02</sup> |
| PSME_00005056-RA | CO(2)-response secreted protease                                                                 | AT1G20160 | ATSBT5.2    | GO:0006508                                                        | 0,2 | NEC | 7,02 10 <sup>-05</sup> |
| PSME_00010853-RA | CO(2)-response secreted protease                                                                 | AT1G20160 | ATSBT5.2    | GO:0006508                                                        | 0,1 | NEC | 3,50 10 <sup>-08</sup> |
| PSME_00044462-RA | CO(2)-response secreted protease                                                                 | AT1G20160 | ATSBT5.2    | GO:0006508                                                        | 0,3 | NEC | 4,23 10 <sup>-03</sup> |
| PSME_00024193-RA | coatomer subunit alpha-1                                                                         | AT1G62020 | AT1G62020.1 | GO:0006888                                                        | 1,3 | EM  | 1,80 10 <sup>-03</sup> |
| PSME_00015316-RA | Coatomer subunit beta-1                                                                          | AT1G66950 | ABCG39      | GO:0006855                                                        | 3,7 | EM  | 2,84 10 <sup>-03</sup> |
| PSME_00015395-RA | Coatomer subunit beta-1                                                                          | AT1G15520 | ABCG40      | GO:0009723 GO:0002229 GO:0006810 GO:0006855 GO:0009753            | 3,0 | EM  | 1,35 10 <sup>-03</sup> |
| PSME_00037059-RA | coproporphyrinogen-III oxidase 1, chloroplastic                                                  | AT1G03475 | LIN2        | GO:0055114 GO:0009735 GO:0033014                                  | 0,6 | NEC | 2,98 10 <sup>-04</sup> |
| PSME_00005557-RA | cucumber peeling cupredoxin                                                                      | AT2G31050 |             |                                                                   | 0,4 | NEC | 1,55 10 <sup>-03</sup> |
| PSME_00019416-RA | cyprosin                                                                                         | AT1G11910 | APA1        | GO:0009651 GO:0006629 GO:0009735 GO:0006508 GO:0030163            | 7,8 | EM  | 4,19 10 <sup>-04</sup> |
| PSME_00022064-RA | cyprosin                                                                                         | AT1G11910 | APA1        | GO:0030163 GO:0006508 GO:0009735 GO:0006629 GO:0009651            | 1,6 | EM  | 3,13 10 <sup>-03</sup> |
| PSME_00029276-RA | cysteine proteinase RD19a-like                                                                   | AT4G39090 | RD19        | GO:0042742 GO:0051603 GO:0006508 GO:0009414 GO:0006970 GO:0009651 | 2,3 | EM  | 2,52 10 <sup>-05</sup> |
| PSME_00021084-RA | cysteine proteinase RD21a-like                                                                   | AT5G43060 | RD21B       | GO:0009651 GO:0051603                                             | 3,4 | EM  | 1,89 10 <sup>-05</sup> |
| PSME_00048674-RA | cysteine-rich repeat secretory protein 15                                                        | AT2G01660 | PDLP6       | GO:0006810 GO:0016032                                             | 0,2 | NEC | 2,68 10 <sup>-06</sup> |
| PSME_00039937-RA | cytochrome P450 76C1                                                                             | AT2G45560 | CYP76C1     | GO:0055114 GO:0044550                                             | 0,1 | NEC | 7,41 10 <sup>-03</sup> |
| PSME_00047109-RA | cytokinin dehydrogenase 6-like                                                                   | AT1G75450 | CKX5        | GO:0055114 GO:0009690                                             | 0,3 | NEC | 4,48 10 <sup>-03</sup> |
| PSME_00022324-RA | D-3-phosphoglycerate dehydrogenase 1, chloroplastic                                              | AT4G34200 | EDA9        | GO:0009793 GO:0009555 GO:0055114                                  | 0,5 | NEC | 2,40 10 <sup>-05</sup> |
| PSME_00017755-RA | DAG protein, chloroplastic                                                                       | AT3G06790 | MORF3       | GO:0006397                                                        | 1,8 | EM  | 1,49 10 <sup>-03</sup> |
| PSME_00032936-RA | DDT domain-containing protein DDB_G0282237-like                                                  | AT5G08630 | AT5G08630.1 |                                                                   | 2,0 | EM  | 2,32 10 <sup>-02</sup> |

|                  |                                                                                                                         |           |             |                                                                                                                  |     |     |                        |
|------------------|-------------------------------------------------------------------------------------------------------------------------|-----------|-------------|------------------------------------------------------------------------------------------------------------------|-----|-----|------------------------|
| PSME_00010814-RA | DEAD-box ATP-dependent RNA helicase 20                                                                                  | AT1G55150 | RH20        | GO:0006364 GO:0000184 GO:0010501                                                                                 | 1,5 | EM  | 2,26 10 <sup>-02</sup> |
| PSME_00039428-RA | DEAD-box ATP-dependent RNA helicase 53                                                                                  | AT3G22330 |             | GO:0010501 GO:0009409                                                                                            | 1,7 | EM  | 2,03 10 <sup>-03</sup> |
| PSME_00040230-RA | delta(24)-sterol reductase                                                                                              | AT3G19820 | DWF1        | GO:0009416 GO:0009826 GO:0006694 GO:0055114 GO:0009834                                                           | 2,0 | EM  | 4,48 10 <sup>-03</sup> |
| PSME_00055611-RA | delta(24)-sterol reductase                                                                                              | AT3G19820 | DWF1        | GO:0009834 GO:0055114 GO:0006694 GO:0009826 GO:0009416                                                           | 1,7 | EM  | 2,83 10 <sup>-04</sup> |
| PSME_00000585-RA | delta-1-pyrroline-5-carboxylate synthase                                                                                | AT2G39800 | P5CS1       | GO:0042538 GO:0055114 GO:0016310 GO:0006561 GO:0009555<br>GO:0009414 GO:0048364 GO:0009737 GO:0006979 GO:0009651 | 2,4 | EM  | 2,48 10 <sup>-04</sup> |
| PSME_00033245-RA | dihydroflavonol-4-reductase                                                                                             | AT5G42800 | DFR         | GO:0055114                                                                                                       | 0,1 | NEC | 4,82 10 <sup>-03</sup> |
| PSME_00007384-RA | dihydroflavonol-4-reductase-like                                                                                        | AT5G42800 | DFR         | GO:0055114                                                                                                       | 0,3 | NEC | 1,44 10 <sup>-02</sup> |
| PSME_00037696-RA | Dihydroipoamide acetyltransferase component of pyruvate dehydrogenase isoform 3                                         | AT3G52200 | LTA3        | GO:0006096 GO:0008152                                                                                            | 0,5 | NEC | 5,04 10 <sup>-05</sup> |
| PSME_00002566-RA | dihydrolipoyllysine-residue acetyltransferase component 4 of pyruvate dehydrogenase complex, chloroplastic              | AT3G25860 | LTA2        | GO:0006096                                                                                                       | 2,0 | EM  | 3,84 10 <sup>-04</sup> |
| PSME_00027089-RA | dihydrolipoyllysine-residue succinyltransferase component of 2-oxoglutarate dehydrogenase complex 2, mitochondrial-like | AT4G26910 | AT4G26910.1 | GO:0006099                                                                                                       | 0,6 | NEC | 3,96 10 <sup>-03</sup> |
| PSME_00031175-RA | dihydropyrimidinase                                                                                                     | AT5G12200 | PYD2        |                                                                                                                  | 0,4 | NEC | 1,03 10 <sup>-02</sup> |
| PSME_00006584-RA | dihydropyrimidine dehydrogenase                                                                                         | AT3G17810 | PYD1        | GO:0055114                                                                                                       | 0,7 | NEC | 1,05 10 <sup>-02</sup> |
| PSME_00000781-RA | DNA gyrase subunit A                                                                                                    | AT3G10690 | GYRA        | GO:0006355 GO:0006265 GO:0006351                                                                                 | 1,6 | EM  | 8,38 10 <sup>-04</sup> |
| PSME_00029161-RA | DNA repair protein recA homolog 3, mitochondrial isoform X1                                                             | AT2G19490 |             | GO:0006281 GO:0006310                                                                                            | 2,0 | EM  | 5,65 10 <sup>-04</sup> |
| PSME_00048815-RA | DNA-directed RNA polymerases II, IV and V subunit 3                                                                     | AT2G15430 |             | GO:0006351                                                                                                       | 1,5 | EM  | 2,69 10 <sup>-02</sup> |
| PSME_00020105-RA | dynamamin-related protein 5A                                                                                            | AT5G42080 | DL1         | GO:0009793 GO:0010051                                                                                            | 1,6 | EM  | 6,08 10 <sup>-03</sup> |
| PSME_00041836-RA | electron transfer flavoprotein subunit beta, mitochondrial                                                              | AT5G43430 | ETFBETA     | GO:0015996 GO:0055114                                                                                            | 0,5 | NEC | 2,90 10 <sup>-03</sup> |
| PSME_00019786-RA | elongation factor 1-gamma                                                                                               | AT1G09640 | AT1G09640.1 | GO:0006414                                                                                                       | 1,5 | EM  | 1,60 10 <sup>-04</sup> |
| PSME_00008845-RA | elongation factor 1-gamma 2-like                                                                                        | AT1G09640 | AT1G09640.1 | GO:0006414                                                                                                       | 0,5 | NEC | 1,29 10 <sup>-03</sup> |
| PSME_00015545-RA | elongation factor Tu, mitochondrial-like isoform X1                                                                     | AT4G02930 | AT4G02930.1 | GO:0006414 GO:0046686                                                                                            | 1,2 | EM  | 1,05 10 <sup>-02</sup> |
| PSME_00016232-RA | endoglucanase 23-like                                                                                                   | AT1G23210 | GH9B6       | GO:0071555 GO:0030245                                                                                            | 0,1 | NEC | 7,43 10 <sup>-05</sup> |
| PSME_00013360-RA | endoglucanase 3-like isoform X1                                                                                         | AT4G02290 | GH9B13      | GO:0030245 GO:0071555                                                                                            | 0,2 | NEC | 4,83 10 <sup>-04</sup> |
| PSME_00034975-RA | enhanced disease susceptibility protein                                                                                 | AT3G48080 | AT3G48080.1 | GO:0006952 GO:0006629                                                                                            | 0,4 | NEC | 1,45 10 <sup>-02</sup> |
| PSME_00002297-RA | enolase 1-like                                                                                                          | AT2G36530 | LOS2        | GO:0009409 GO:0006355 GO:0009651 GO:0009737 GO:0006096<br>GO:0006351 GO:0009416 GO:0046686                       | 1,7 | EM  | 1,13 10 <sup>-03</sup> |
| PSME_00042482-RA | erlin-2-B                                                                                                               | AT2G03510 | AT2G03510.1 |                                                                                                                  | 0,7 | NEC | 1,09 10 <sup>-02</sup> |
| PSME_00056370-RA | esterase/lipase/thioesterase family protein                                                                             | AT1G52760 | LysoPL2     | GO:0009809 GO:0042542 GO:0006979 GO:0046686 GO:0006629                                                           | 0,5 | NEC | 1,11 10 <sup>-02</sup> |
| PSME_00055777-RA | Eukaryotic aspartyl protease family protein isoform 1                                                                   | AT3G61820 | AT3G61820.1 | GO:0006508                                                                                                       | 0,2 | NEC | 4,29 10 <sup>-04</sup> |
| PSME_00051846-RA | eukaryotic peptide chain release factor subunit 1-3                                                                     | AT3G26618 | ERF1-3      | GO:0006415                                                                                                       | 0,7 | NEC | 3,53 10 <sup>-03</sup> |
| PSME_00056021-RA | eukaryotic translation elongation factor, putative                                                                      | AT1G56070 | LOS1        | GO:0009409 GO:0009735 GO:0006414                                                                                 | 1,6 | EM  | 4,40 10 <sup>-03</sup> |
| PSME_00008125-RA | eukaryotic translation initiation factor 3 subunit A                                                                    | AT4G11420 | EIF3A       | GO:0006413                                                                                                       | 1,4 | EM  | 8,79 10 <sup>-03</sup> |
| PSME_00056689-RA | eukaryotic translation initiation factor 3 subunit G                                                                    | AT3G11400 | EIF3G1      | GO:0006413                                                                                                       | 1,3 | EM  | 3,92 10 <sup>-03</sup> |
| PSME_00042951-RA | eukaryotic translation initiation factor 5A-2-like                                                                      | AT1G13950 | ELF5A-1     | GO:0045901 GO:0006452 GO:0006413 GO:0045905                                                                      | 1,4 | EM  | 6,74 10 <sup>-03</sup> |
| PSME_00051817-RA | expansin-A11-like                                                                                                       | AT1G20190 | EXPA11      | GO:0009664 GO:0009828 GO:0009826 GO:0009831                                                                      | 7,2 | EM  | 8,06 10 <sup>-09</sup> |
| PSME_00004400-RA | expansin-like A1                                                                                                        | AT3G45970 | EXLA1       | GO:0009826 GO:0009828                                                                                            | 0,5 | NEC | 1,52 10 <sup>-03</sup> |
| PSME_00005463-RA | extensin                                                                                                                | AT5G09620 | AT5G09620.1 |                                                                                                                  | 2,4 | EM  | 1,59 10 <sup>-02</sup> |
| PSME_00022126-RA | extradiol ring-cleavage dioxygenase-like                                                                                | AT4G15093 | LigB        | GO:0055114 GO:0006725                                                                                            | 1,8 | EM  | 8,34 10 <sup>-03</sup> |
| PSME_00003708-RA | far upstream element-binding protein 1-like                                                                             | AT2G25970 | AT2G25970.1 |                                                                                                                  | 4,8 | EM  | 2,62 10 <sup>-03</sup> |

|                  |                                                                             |           |             |                                                                              |     |     |      |                   |
|------------------|-----------------------------------------------------------------------------|-----------|-------------|------------------------------------------------------------------------------|-----|-----|------|-------------------|
| PSME_00004229-RA | ferredoxin-dependent glutamate synthase 1, chloroplasmic/mitochondrial-like | AT5G04140 | GLU1        | GO:0009744 GO:0009853 GO:0009416 GO:0006537 GO:0055114                       | 0,5 | NEC | 1,40 | 10 <sup>-03</sup> |
| PSME_00047906-RA | ferredoxin--NADP reductase, putative                                        | AT4G05390 | RFNR1       | GO:0015979 GO:0055114                                                        | 0,4 | NEC | 3,38 | 10 <sup>-04</sup> |
| PSME_00012777-RA | Ferredoxin--nitrite reductase                                               | AT2G15620 | NIR1        | GO:0010167 GO:0042128 GO:0055114                                             | 0,2 | NEC | 1,33 | 10 <sup>-02</sup> |
| PSME_00045450-RA | Ferredoxin-related                                                          | AT1G02180 | AT1G02180.1 |                                                                              | 4,0 | EM  | 2,05 | 10 <sup>-04</sup> |
| PSME_00038196-RA | fibrous sheath CABYR-binding protein-like isoform X2                        |           |             |                                                                              | 0,1 | NEC | 1,50 | 10 <sup>-04</sup> |
| PSME_00055512-RA | fibrous sheath CABYR-binding protein-like isoform X2                        |           |             |                                                                              | 0,0 | NEC | 1,40 | 10 <sup>-07</sup> |
| PSME_00017291-RA | formate dehydrogenase, mitochondrial                                        | AT5G14780 | FDH         | GO:0009611 GO:0046686 GO:0055114                                             | 0,4 | NEC | 2,23 | 10 <sup>-04</sup> |
| PSME_00055424-RA | fruit protein pKIWI501-like                                                 |           |             |                                                                              | 0,2 | NEC | 8,42 | 10 <sup>-04</sup> |
| PSME_00020981-RA | fumarate hydratase 1, mitochondrial                                         | AT2G47510 | FUM1        | GO:0009651 GO:0006979 GO:0006099 GO:0006108                                  | 1,4 | EM  | 9,33 | 10 <sup>-03</sup> |
| PSME_00005366-RA | gamma carbonic anhydrase 1, mitochondrial                                   | AT1G47260 | GAMMA CA2   | GO:0009901 GO:0009853 GO:0009651                                             | 0,7 | NEC | 2,27 | 10 <sup>-03</sup> |
| PSME_00041516-RA | GDSL esterase/lipase At4g01130 isoform X1                                   | AT4G01130 | AT4G01130.1 | GO:0016042                                                                   | 2,6 | EM  | 1,96 | 10 <sup>-04</sup> |
| PSME_00021218-RA | glucan endo-1,3-beta-glucosidase 12                                         | AT5G24318 |             |                                                                              | 0,1 | NEC | 1,07 | 10 <sup>-05</sup> |
| PSME_00023819-RA | glucan endo-1,3-beta-glucosidase GII-like                                   | AT4G16260 | AT4G16260.1 | GO:0005975 GO:0009651                                                        | 0,2 | NEC | 2,02 | 10 <sup>-03</sup> |
| PSME_00019983-RA | glucan endo-1,3-beta-glucosidase, acidic isoform-like                       | AT4G16260 | AT4G16260.1 | GO:0009651 GO:0005975                                                        | 0,1 | NEC | 5,70 | 10 <sup>-03</sup> |
| PSME_00033216-RA | glucose-1-phosphate adenyltransferase                                       | AT5G48300 | ADG1        | GO:0005978 GO:0019252                                                        | 2,5 | EM  | 1,46 | 10 <sup>-02</sup> |
| PSME_00009881-RA | glucose-6-phosphate 1-dehydrogenase, cytoplasmic isoform                    | AT5G40760 | G6PD6       | GO:0055114 GO:0006006                                                        | 0,4 | NEC | 1,48 | 10 <sup>-02</sup> |
| PSME_00009882-RA | glucose-6-phosphate 1-dehydrogenase, cytoplasmic isoform                    | AT5G40760 | G6PD6       | GO:0055114 GO:0006006                                                        | 0,3 | NEC | 8,88 | 10 <sup>-06</sup> |
| PSME_00015181-RA | glutamate synthase 1                                                        | AT5G53460 | GLT1        | GO:0042128 GO:0055114 GO:0046686 GO:0006537 GO:0009735                       | 2,5 | EM  | 1,26 | 10 <sup>-06</sup> |
| PSME_00010711-RA | glutathione S-transferase F10-like                                          | AT2G30860 | GSTF9       | GO:0055114 GO:0006952 GO:0006749 GO:0042742 GO:0046686                       | 0,1 | NEC | 1,99 | 10 <sup>-05</sup> |
| PSME_00000864-RA | glutathione S-transferase L3-like isoform X1                                | AT5G02790 | GSTL3       | GO:0046686 GO:0006749 GO:0009636                                             | 1,6 | EM  | 1,50 | 10 <sup>-03</sup> |
| PSME_00031819-RA | glutathione S-transferase omega-like 2                                      | AT4G19880 | AT4G19880.2 | GO:0046686                                                                   | 0,6 | NEC | 7,84 | 10 <sup>-03</sup> |
| PSME_00032764-RA | glutathione S-transferase U17                                               | AT1G59700 | GSTU16      | GO:0006749                                                                   | 0,1 | NEC | 2,05 | 10 <sup>-04</sup> |
| PSME_00055362-RA | glutathione S-transferase U17-like                                          | AT1G59700 | GSTU16      | GO:0006749                                                                   | 4,4 | EM  | 9,62 | 10 <sup>-05</sup> |
| PSME_00020299-RA | glutathione S-transferase, amino-terminal domain protein                    | AT2G30870 | GSTF10      | GO:0009414 GO:0046686 GO:0006749                                             | 0,3 | NEC | 2,20 | 10 <sup>-03</sup> |
| PSME_00032232-RA | glutathione-dependent formaldehyde dehydrogenase                            | AT5G43940 | HOT5        | GO:0008219 GO:0055114 GO:0010286 GO:0009611 GO:0048316                       | 0,2 | NEC | 5,31 | 10 <sup>-03</sup> |
| PSME_00044624-RA | glutelin type-A 1-like                                                      | AT2G28680 | AT2G28680.1 |                                                                              | 8,3 | EM  | 7,82 | 10 <sup>-10</sup> |
| PSME_00015394-RA | glyceraldehyde-3-phosphate dehydrogenase GAPCP2, chloroplasmic              | AT1G16300 |             | GO:0006096 GO:0006006 GO:0055114 GO:0080022 GO:0005975                       | 0,8 | NEC | 1,28 | 10 <sup>-02</sup> |
| PSME_00007962-RA | glycerate dehydrogenase isoform X2                                          | AT1G68010 | HPR         | GO:0055114 GO:0009853                                                        | 0,7 | NEC | 1,13 | 10 <sup>-03</sup> |
| PSME_00017753-RA | glycerophosphodiester phosphodiesterase GDPDL3 isoform X1                   | AT5G58170 | SVL5        | GO:0006071 GO:0006629                                                        | 2,1 | EM  | 2,24 | 10 <sup>-05</sup> |
| PSME_00008228-RA | glycerophosphodiester phosphodiesterase GDPDL6                              | AT4G26690 | SHV3        | GO:0006071 GO:0006629                                                        | 1,8 | EM  | 1,58 | 10 <sup>-02</sup> |
| PSME_00021849-RA | glycine-rich protein DOT1                                                   | AT1G76010 | AT1G76010.1 |                                                                              | 2,8 | EM  | 8,21 | 10 <sup>-04</sup> |
| PSME_00030801-RA | glycine-rich RNA-binding protein GRP1A-like                                 | AT4G39260 | CCR1        | GO:0009651 GO:0009737 GO:0009735 GO:0009409                                  | 1,4 | EM  | 9,06 | 10 <sup>-03</sup> |
| PSME_00055366-RA | glycine-rich RNA-binding, abscisic acid-inducible protein isoform X1        | AT5G04280 | AtRZ-1c     | GO:0045892 GO:0009409 GO:0009414                                             | 1,5 | EM  | 5,58 | 10 <sup>-03</sup> |
| PSME_00028884-RA | heat shock 70 kDa protein 8                                                 | AT2G32120 | HSP70T-2    | GO:0009644 GO:0009408 GO:0042542 GO:0006457                                  | 0,3 | NEC | 2,79 | 10 <sup>-04</sup> |
| PSME_00017046-RA | heat shock 70 kDa protein, mitochondrial                                    | AT5G09590 | HSP70       | GO:0006457 GO:0009651 GO:0009408 GO:0046686                                  | 2,4 | EM  | 1,57 | 10 <sup>-03</sup> |
| PSME_00002089-RA | heat shock protein 83-like                                                  | AT5G52640 | HSP90.1     | GO:0009408 GO:0042742 GO:0061077                                             | 0,3 | NEC | 1,82 | 10 <sup>-06</sup> |
| PSME_00046532-RA | heat shock protein 83-like                                                  | AT5G52640 | HSP90.1     | GO:0042742 GO:0061077 GO:0009408                                             | 0,4 | NEC | 9,33 | 10 <sup>-05</sup> |
| PSME_00005303-RA | heat shock protein 90-1                                                     | AT2G04030 | CR88        | GO:0045037 GO:0009414 GO:0009704 GO:0009793 GO:0009408 GO:0009651 GO:0006457 | 1,9 | EM  | 1,02 | 10 <sup>-04</sup> |

|                  |                                                          |           |             |                                                                                                                                |     |     |                        |
|------------------|----------------------------------------------------------|-----------|-------------|--------------------------------------------------------------------------------------------------------------------------------|-----|-----|------------------------|
| PSME_00005257-RA | heme oxygenase 1, chloroplastic                          | AT2G26670 | TED4        | GO:0015979 GO:0006788 GO:0009813 GO:0010119                                                                                    | 0,3 | NEC | 4,62 10 <sup>-03</sup> |
| PSME_00001372-RA | heterogeneous nuclear ribonucleoprotein 1-like           | AT5G55550 | AT5G55550.3 |                                                                                                                                | 2,6 | EM  | 1,47 10 <sup>-02</sup> |
| PSME_00041420-RA | heterogeneous nuclear ribonucleoprotein A2 homolog 1     | AT3G13224 |             |                                                                                                                                | 1,6 | EM  | 2,34 10 <sup>-03</sup> |
| PSME_00008343-RA | heterogeneous nuclear ribonucleoprotein F-like           | AT5G66010 | AT5G66010.1 |                                                                                                                                | 1,6 | EM  | 5,38 10 <sup>-03</sup> |
| PSME_00001780-RA | high mobility group B protein 1-like                     | AT3G51880 | HMGB1       | GO:0006333                                                                                                                     | 1,8 | EM  | 2,00 10 <sup>-03</sup> |
| PSME_00011989-RA | histone deacetylase HDT2-like                            | AT3G44750 | HDA3        | GO:0006355 GO:0009294 GO:0006351                                                                                               | 2,1 | EM  | 6,87 10 <sup>-03</sup> |
| PSME_00013947-RA | hsp70-Hsp90 organizing protein 3                         | AT4G12400 | Hop3        | GO:0009644 GO:0009408 GO:0010286 GO:0042542                                                                                    | 0,6 | NEC | 1,89 10 <sup>-03</sup> |
| PSME_00051470-RA | hydroxyphenylpyruvate reductase-like, partial            | AT1G79870 | AT1G79870.1 | GO:0055114                                                                                                                     | 1,6 | EM  | 1,07 10 <sup>-03</sup> |
| PSME_00009048-RA | hypersensitive-induced response protein 1                | AT5G62740 | HIR1        |                                                                                                                                | 0,5 | NEC | 2,94 10 <sup>-02</sup> |
| PSME_00033280-RA | importin alpha, putative                                 | AT3G06720 | IMPA-1      | GO:0006886 GO:0006607 GO:0006606                                                                                               | 2,1 | EM  | 6,27 10 <sup>-05</sup> |
| PSME_00011005-RA | importin beta-like SAD2                                  | AT2G31660 | SAD2        | GO:0006606 GO:0007165                                                                                                          | 1,6 | EM  | 2,72 10 <sup>-04</sup> |
| PSME_00034436-RA | inositol-3-phosphate synthase isoform X1                 | AT2G22240 | MIPS2       | GO:0006021 GO:0009644 GO:0009408 GO:0009793 GO:0051607<br>GO:0008654 GO:0042542 GO:0009733 GO:0016036 GO:0050832<br>GO:0042742 | 4,9 | EM  | 2,87 10 <sup>-08</sup> |
| PSME_00003232-RA | isoflavone reductase-like protein                        | AT4G39230 | AT4G39230.1 | GO:0046686                                                                                                                     | 0,5 | NEC | 1,41 10 <sup>-03</sup> |
| PSME_00047891-RA | isopentenyl diphosphate isomerase                        | AT5G16440 | IPP1        | GO:0050992 GO:0008299 GO:0015979                                                                                               | 0,7 | NEC | 9,05 10 <sup>-03</sup> |
| PSME_00055258-RA | kinesin light chain, putative                            | AT4G10840 | KLCR1       |                                                                                                                                | 2,0 | EM  | 2,53 10 <sup>-02</sup> |
| PSME_00001492-RA | la protein 1                                             | AT4G32720 | La1         | GO:0042254 GO:0009790                                                                                                          | 1,3 | EM  | 2,49 10 <sup>-03</sup> |
| PSME_00013997-RA | L-ascorbate oxidase homolog                              | AT4G22010 | sks4        | GO:0055114                                                                                                                     | 3,0 | EM  | 1,18 10 <sup>-04</sup> |
| PSME_00002336-RA | L-ascorbate peroxidase 2                                 | AT1G07890 | APX1        | GO:0055114 GO:0042744 GO:0006979 GO:0009651 GO:0046686<br>GO:0009793 GO:0009408 GO:0009735                                     | 0,4 | NEC | 4,35 10 <sup>-07</sup> |
| PSME_00033903-RA | L-ascorbate peroxidase, cytosolic                        | AT1G07890 | APX1        | GO:0055114 GO:0006979 GO:0009651 GO:0042744 GO:0009735<br>GO:0009408 GO:0009793 GO:0046686                                     | 2,1 | EM  | 2,74 10 <sup>-05</sup> |
| PSME_00026301-RA | leucine-rich repeat extensin-like protein 4              | AT3G24480 | AT3G24480.1 | GO:0071555                                                                                                                     | 2,0 | EM  | 7,44 10 <sup>-05</sup> |
| PSME_00055770-RA | leucine-rich repeat extensin-like protein 4              | AT3G24480 | AT3G24480.1 | GO:0071555                                                                                                                     | 2,7 | EM  | 2,79 10 <sup>-04</sup> |
| PSME_00025010-RA | leucine--tRNA ligase, cytoplasmic                        | AT1G09620 | AT1G09620.1 | GO:0006418                                                                                                                     | 1,5 | EM  | 9,12 10 <sup>-03</sup> |
| PSME_00008869-RA | linoleate 9S-lipoxygenase 5, chloroplastic-like          | AT3G22400 | LOX5        | GO:0010311 GO:0048364                                                                                                          | 0,1 | NEC | 6,65 10 <sup>-03</sup> |
| PSME_00039391-RA | lipase-like PAD4                                         | AT3G48080 | AT3G48080.1 | GO:0006629 GO:0006952                                                                                                          | 0,5 | NEC | 7,12 10 <sup>-03</sup> |
| PSME_00043872-RA | LOW QUALITY PROTEIN: phospholipase A1-Ildelta            | AT2G42690 | AT2G42690.1 | GO:0006629 GO:0016042                                                                                                          | 0,1 | NEC | 8,44 10 <sup>-04</sup> |
| PSME_00046745-RA | malate dehydrogenase, mitochondrial-like                 | AT1G53240 | mMDH1       | GO:0006108 GO:0005975 GO:0009409 GO:0042742 GO:0009651<br>GO:0006099 GO:0046686                                                | 0,6 | NEC | 4,27 10 <sup>-04</sup> |
| PSME_00007502-RA | mannose-1-phosphate guanylyltransferase alpha isoform X1 | AT1G74910 | AT1G74910.1 | GO:0046686 GO:0009058                                                                                                          | 2,4 | EM  | 1,46 10 <sup>-05</sup> |
| PSME_00049017-RA | mannose-1-phosphate guanylyltransferase 1                | AT2G39770 | CYT1        | GO:0030244 GO:0009753 GO:0042742 GO:0009651 GO:0009298<br>GO:0019853 GO:0009408 GO:0009058                                     | 1,7 | EM  | 1,49 10 <sup>-02</sup> |
| PSME_00009971-RA | cysteine endopeptidase 1                                 | AT5G50260 | CEP1        | GO:0009555 GO:0006508 GO:0050832 GO:0051603                                                                                    | 2,6 | EM  | 3,85 10 <sup>-03</sup> |
| PSME_00031225-RA | mitochondrial aldehyde dehydrogenase family protein      | AT1G23800 | ALDH2B7     | GO:0055114                                                                                                                     | 0,2 | NEC | 1,97 10 <sup>-03</sup> |
| PSME_00019501-RA | mitochondrial outer membrane protein porin of 36 kDa     | AT3G01280 | VDAC1       | GO:0006952 GO:0006820                                                                                                          | 1,5 | EM  | 1,38 10 <sup>-04</sup> |
| PSME_00040188-RA | mitochondrial phosphate carrier protein 3, mitochondrial | AT3G48850 | PHT3;2      | GO:0009651 GO:0006839 GO:0006810                                                                                               | 3,6 | EM  | 4,15 10 <sup>-05</sup> |
| PSME_00018930-RA | mitochondrial Rho GTPase 1-like isoform X1               | AT5G27540 | MIRO1       | GO:0007264 GO:0009790 GO:0007005 GO:0009793                                                                                    | 1,5 | EM  | 9,07 10 <sup>-03</sup> |
| PSME_00019117-RA | molybdate-anion transporter                              | AT4G27720 | AT4G27720.1 | GO:0015689                                                                                                                     | 1,5 | EM  | 1,78 10 <sup>-02</sup> |
| PSME_00022879-RA | myosin heavy chain, skeletal muscle                      | AT2G32240 | AT2G32240.1 | GO:0009737 GO:0046686                                                                                                          | 2,4 | EM  | 3,26 10 <sup>-03</sup> |
| PSME_00001652-RA | NADH dehydrogenase                                       | AT2G20360 | AT2G20360.1 | GO:0009651 GO:0055114                                                                                                          | 0,5 | NEC | 3,57 10 <sup>-03</sup> |
| PSME_00026116-RA | NADH dehydrogenase                                       | AT5G08530 | CI51        | GO:0055114 GO:0006120                                                                                                          | 0,5 | NEC | 6,43 10 <sup>-04</sup> |
| PSME_00013240-RA | NADP-dependent malic enzyme                              | AT1G79750 | NADP-ME4    | GO:0055114 GO:0006108 GO:0006633 GO:0009845 GO:0009793                                                                         | 0,4 | NEC | 1,26 10 <sup>-04</sup> |

|                  |                                                                      |           |             |                                                                              |         |                        |
|------------------|----------------------------------------------------------------------|-----------|-------------|------------------------------------------------------------------------------|---------|------------------------|
| PSME_00006922-RA | N-alpha-acetyltransferase 15, NatA auxiliary subunit-like isoform X2 | AT1G80410 | EMB2753     | GO:0009793 GO:0009414                                                        | 1,8 EM  | 7,80 10 <sup>-05</sup> |
| PSME_00032826-RA | nitrilase/nitrile hydratase NIT4A-like protein                       | AT5G22300 | NIT4        | GO:0006807                                                                   | 0,1 NEC | 1,61 10 <sup>-06</sup> |
| PSME_00006791-RA | non-symbiotic hemoglobin, putative                                   | AT2G16060 | HB1         |                                                                              | 0,5 NEC | 4,04 10 <sup>-03</sup> |
| PSME_00054870-RA | not_annotated                                                        |           |             |                                                                              | 0,1 NEC | 2,85 10 <sup>-04</sup> |
| PSME_00006308-RA | nuclear cap-binding protein subunit 1                                | AT2G13540 | ABH1        | GO:0009737 GO:0000184 GO:0006370 GO:0006412 GO:0006406 GO:0000398            | 1,7 EM  | 8,94 10 <sup>-04</sup> |
| PSME_00026346-RA | Os02g0831900                                                         | AT4G23650 | CDPK6       | GO:0010119 GO:0018105 GO:0035556 GO:0009738 GO:0046777 GO:0006468 GO:0009651 | 2,6 EM  | 1,23 10 <sup>-06</sup> |
| PSME_00030199-RA | Os06g0602600                                                         | AT2G34160 | AT2G34160.1 |                                                                              | 1,8 EM  | 1,15 10 <sup>-02</sup> |
| PSME_00053283-RA | Os06g0726100                                                         | AT3G12500 | HCHIB       | GO:0006032 GO:0016998 GO:0031640 GO:0000272 GO:0050832 GO:0046686            | 0,3 NEC | 4,58 10 <sup>-03</sup> |
| PSME_00000323-RA | Os09g0400100                                                         | AT4G39330 | CAD9        | GO:0055114 GO:0009809 GO:0009735                                             | 11,6 EM | 8,75 10 <sup>-03</sup> |
| PSME_00048700-RA | Os12g0468600                                                         |           |             |                                                                              | 0,2 NEC | 1,12 10 <sup>-02</sup> |
| PSME_00003087-RA | Os12g0623900                                                         | AT5G17920 | ATMS1       | GO:0009086 GO:0009651 GO:0046686 GO:0032259                                  | 1,7 EM  | 4,26 10 <sup>-04</sup> |
| PSME_00024602-RA | patellin-3                                                           | AT1G30690 | AT1G30690.1 | GO:0006810 GO:0007049 GO:0051301                                             | 1,6 EM  | 2,90 10 <sup>-04</sup> |
| PSME_00050927-RA | pathogenesis-related protein bet V I family protein                  |           |             |                                                                              | 0,2 NEC | 4,88 10 <sup>-03</sup> |
| PSME_00054279-RA | pathogenesis-related protein PR-4-like                               | AT3G04720 | PR4         | GO:0031640 GO:0042742 GO:0009723 GO:0009651                                  | 0,1 NEC | 7,64 10 <sup>-05</sup> |
| PSME_00043968-RA | pectinesterase                                                       | AT1G53830 | PME2        | GO:0045490 GO:0042545                                                        | 0,1 NEC | 1,11 10 <sup>-03</sup> |
| PSME_00043969-RA | pectinesterase-like                                                  | AT1G11580 | PMEPCRA     | GO:0031640 GO:0042545 GO:0050832 GO:0017148 GO:0045490                       | 0,1 NEC | 3,30 10 <sup>-08</sup> |
| PSME_00004775-RA | peptide methionine sulfoxide reductase A1-like                       | AT5G07470 | PMSR3       | GO:0055114 GO:0006464 GO:0009416 GO:0006979                                  | 0,5 NEC | 5,14 10 <sup>-04</sup> |
| PSME_00037764-RA | peptidyl-prolyl cis-trans isomerase                                  | AT2G16600 | ROC3        | GO:0000413 GO:0006457 GO:0007165                                             | 2,1 EM  | 9,62 10 <sup>-04</sup> |
| PSME_00044050-RA | peptidyl-prolyl cis-trans isomerase                                  | AT2G16600 | ROC3        | GO:0000413 GO:0007165 GO:0006457                                             | 1,4 EM  | 1,55 10 <sup>-02</sup> |
| PSME_00010934-RA | peptidyl-prolyl cis-trans isomerase CYP40                            | AT2G15790 | SQN         | GO:0000413 GO:0006457                                                        | 2,5 EM  | 4,44 10 <sup>-04</sup> |
| PSME_00016025-RA | peroxidase 12                                                        | AT1G71695 | AT1G71695.1 | GO:0055114 GO:0042744 GO:0006979                                             | 0,1 NEC | 1,19 10 <sup>-02</sup> |
| PSME_00016027-RA | peroxidase 12                                                        | AT1G71695 | AT1G71695.1 | GO:0055114 GO:0042744 GO:0006979                                             | 0,4 NEC | 4,26 10 <sup>-04</sup> |
| PSME_00030113-RA | peroxidase 12                                                        | AT1G71695 | AT1G71695.1 | GO:0055114 GO:0006979 GO:0042744                                             | 0,2 NEC | 4,13 10 <sup>-04</sup> |
| PSME_00038261-RA | peroxidase 12                                                        | AT1G71695 | AT1G71695.1 | GO:0055114 GO:0042744 GO:0006979                                             | 0,3 NEC | 3,24 10 <sup>-06</sup> |
| PSME_00048140-RA | peroxidase 12-like                                                   | AT1G71695 | AT1G71695.1 | GO:0055114 GO:0042744 GO:0006979                                             | 0,6 NEC | 2,33 10 <sup>-02</sup> |
| PSME_00038357-RA | peroxidase 55-like                                                   | AT4G37530 |             | GO:0042744 GO:0009651 GO:0006979 GO:0055114                                  | 0,3 NEC | 3,62 10 <sup>-03</sup> |
| PSME_00013623-RA | peroxidase 56-like, partial                                          | AT5G05340 | PRX52       | GO:0009809 GO:0055114 GO:0042744 GO:0006979                                  | 0,2 NEC | 1,97 10 <sup>-04</sup> |
| PSME_00016462-RA | peroxidase 72-like                                                   | AT5G66390 | PRX72       | GO:0042744 GO:0006979 GO:0009809 GO:0055114                                  | 0,1 NEC | 8,22 10 <sup>-06</sup> |
| PSME_00005464-RA | peroxiredoxin-2B-like                                                | AT1G60740 | AT1G60740.1 | GO:0045454 GO:0055114                                                        | 1,9 EM  | 2,24 10 <sup>-03</sup> |
| PSME_00012153-RA | peroxisomal acyl-coenzyme A oxidase 1                                | AT4G16760 | ACX1        | GO:0009555 GO:0006635 GO:0009620 GO:0009695 GO:0046686 GO:0009611            | 1,5 EM  | 2,85 10 <sup>-03</sup> |
| PSME_00017712-RA | peroxisomal fatty acid beta-oxidation multifunctional protein AIM1   | AT4G29010 | AIM1        | GO:0009695 GO:0009845 GO:0009908 GO:0007275 GO:0006635                       | 2,7 EM  | 3,06 10 <sup>-04</sup> |
| PSME_00021289-RA | phosphoenolpyruvate carboxylase 4                                    | AT1G68750 | PPC4        | GO:0015977 GO:0015979 GO:0006099                                             | 9,5 EM  | 7,02 10 <sup>-05</sup> |
| PSME_00010128-RA | phosphoethanolamine N-methyltransferase 1 isoform X1                 | AT1G73600 |             | GO:0032259                                                                   | 4,9 EM  | 5,11 10 <sup>-05</sup> |
| PSME_00019283-RA | phosphoglucomutase, chloroplastic-like isoform X1                    | AT5G51820 | PGM         | GO:0005975 GO:0019252 GO:0009409 GO:0005978 GO:0006006                       | 0,4 NEC | 2,34 10 <sup>-04</sup> |
| PSME_00035611-RA | phosphoglucomutase, putative                                         | AT5G17530 | AT5G17530.3 | GO:0005975                                                                   | 0,6 NEC | 1,50 10 <sup>-02</sup> |
| PSME_00020464-RA | phosphoglycerate kinase                                              | AT1G79550 | PGK         | GO:0009408 GO:0009416 GO:0006096                                             | 0,6 NEC | 4,44 10 <sup>-03</sup> |
| PSME_00020463-RA | phosphoglycerate kinase                                              | AT1G79550 | PGK         | GO:0006096 GO:0009408 GO:0009416                                             | 2,3 EM  | 5,90 10 <sup>-04</sup> |
| PSME_00042401-RA | phosphoglycerate kinase, chloroplastic                               | AT3G12780 | PGK1        | GO:0009409 GO:0046686 GO:0019253 GO:0006096                                  | 0,5 NEC | 5,73 10 <sup>-04</sup> |
| PSME_00008521-RA | phosphoinositide phosphatase SAC7 isoform X3                         | AT3G51460 | RHD4        | GO:0009611                                                                   | 1,6 EM  | 2,03 10 <sup>-02</sup> |

|                  |                                                                     |           |             |                                                                                            |      |     |                        |
|------------------|---------------------------------------------------------------------|-----------|-------------|--------------------------------------------------------------------------------------------|------|-----|------------------------|
| PSME_00012089-RA | phospholipase D alpha 1-like                                        | AT3G15730 | PLDALPHA1   | GO:0046470 GO:0009737 GO:0009845 GO:0046686 GO:0006631<br>GO:0009738 GO:0016042 GO:0010119 | 0,3  | NEC | 7,05 10 <sup>-03</sup> |
| PSME_00016010-RA | phosphoserine aminotransferase 1, chloroplastic-like                | AT4G35630 | PSAT1       | GO:0009735                                                                                 | 0,6  | NEC | 7,08 10 <sup>-04</sup> |
| PSME_00053194-RA | phosphoserine aminotransferase 2, chloroplastic-like, partial       | AT4G35630 | PSAT1       | GO:0009735                                                                                 | 0,4  | NEC | 1,01 10 <sup>-05</sup> |
| PSME_00002972-RA | plasma membrane-associated cation-binding protein 1                 | AT4G20260 | PCAP1       | GO:0009414 GO:0009735 GO:0075733 GO:0051716 GO:0009409<br>GO:0042742                       | 11,5 | EM  | 1,54 10 <sup>-02</sup> |
| PSME_00014881-RA | plasma membrane-associated cation-binding protein 1                 | AT4G20260 | PCAP1       | GO:0009409 GO:0042742 GO:0009414 GO:0009735 GO:0075733<br>GO:0051716                       | 2,9  | EM  | 7,77 10 <sup>-03</sup> |
| PSME_00011312-RA | plastidic glucose transporter 4-like                                | AT5G16150 | PGLCT       | GO:0046323 GO:0035428                                                                      | 0,4  | NEC | 1,02 10 <sup>-03</sup> |
| PSME_00011513-RA | polyadenylate-binding protein 2                                     | AT4G34110 | PAB2        | GO:0006413 GO:0016032 GO:0009651 GO:0006446 GO:0000184                                     | 1,7  | EM  | 7,47 10 <sup>-05</sup> |
| PSME_00028723-RA | polyadenylate-binding protein 5                                     | AT1G49760 | PAB8        | GO:0046686 GO:0006417 GO:0016032                                                           | 0,6  | NEC | 1,53 10 <sup>-02</sup> |
| PSME_00003206-RA | pre-mRNA-processing factor 39                                       | AT1G04080 | PRP39       |                                                                                            | 1,2  | EM  | 1,87 10 <sup>-02</sup> |
| PSME_00000080-RA | pre-mRNA-processing protein 40A                                     | AT1G44910 | PRP40A      | GO:0006355 GO:0008380 GO:0000398 GO:0006351                                                | 1,6  | EM  | 2,09 10 <sup>-02</sup> |
| PSME_00012209-RA | pre-mRNA-processing-splicing factor 8-like                          | AT1G80070 | SUS2        | GO:0000398                                                                                 | 1,4  | EM  | 1,59 10 <sup>-02</sup> |
| PSME_00007928-RA | presequence protease 2, chloroplastic/mitochondrial-like isoform X2 | AT1G49630 | PREP2       | GO:0006508 GO:0016485                                                                      | 1,5  | EM  | 3,31 10 <sup>-04</sup> |
| PSME_00037603-RA | probable ADP-ribosylation factor GTPase-activating protein AGD8     | AT4G17890 | AGD8        |                                                                                            | 5,9  | EM  | 2,23 10 <sup>-04</sup> |
| PSME_00000620-RA | probable aldehyde dehydrogenase                                     | AT5G62530 | ALDH12A1    | GO:0072593 GO:0055114 GO:0010133 GO:0009651                                                | 1,5  | EM  | 4,93 10 <sup>-03</sup> |
| PSME_00017173-RA | probable aldo-keto reductase 1                                      | AT1G60730 | AT1G60730.3 | GO:0055114                                                                                 | 0,6  | NEC | 1,65 10 <sup>-03</sup> |
| PSME_00021883-RA | probable aldo-keto reductase 4                                      | AT1G60710 | ATB2        | GO:0046686 GO:0055114                                                                      | 0,6  | NEC | 6,92 10 <sup>-05</sup> |
| PSME_00021353-RA | probable apyrase 1                                                  | AT5G18280 | APY2        | GO:0009846                                                                                 | 2,3  | EM  | 8,67 10 <sup>-04</sup> |
| PSME_00013602-RA | probable chalcone--flavonone isomerase 3                            | AT5G05270 | CHIL        | GO:0080167 GO:0009813                                                                      | 0,2  | NEC | 1,01 10 <sup>-02</sup> |
| PSME_00054019-RA | probable cinnamyl alcohol dehydrogenase 1                           | AT1G72680 | CAD1        | GO:0055114 GO:0009809                                                                      | 0,5  | NEC | 9,32 10 <sup>-03</sup> |
| PSME_00021323-RA | probable fructokinase-1                                             | AT3G59480 | AT3G59480.1 | GO:0019252                                                                                 | 3,3  | EM  | 3,72 10 <sup>-08</sup> |
| PSME_00055205-RA | probable glutathione S-transferase GSTU6-like                       | AT1G10370 | ERD9        | GO:0080167 GO:0006749 GO:0009704 GO:0009651                                                | 0,4  | NEC | 1,55 10 <sup>-03</sup> |
| PSME_00000032-RA | probable GPI-anchored adhesin-like protein PGA55 isoform X2         | AT5G53620 | AT5G53620.1 |                                                                                            | 2,1  | EM  | 1,01 10 <sup>-02</sup> |
| PSME_00032525-RA | probable histone-arginine methyltransferase 1.3                     | AT5G49020 | PRMT4A      | GO:0006355 GO:0009909 GO:0010228 GO:0006351                                                | 1,9  | EM  | 7,87 10 <sup>-04</sup> |
| PSME_00054694-RA | probable inactive receptor kinase At1g48480                         | AT3G17840 | RLK902      | GO:0007169 GO:0006468                                                                      | 3,2  | EM  | 2,30 10 <sup>-03</sup> |
| PSME_00017674-RA | probable methyltransferase PMT14                                    | AT1G26850 | AT1G26850.1 | GO:0032259                                                                                 | 1,6  | EM  | 4,44 10 <sup>-03</sup> |
| PSME_00034626-RA | probable methyltransferase PMT17 isoform X1                         | AT4G10440 | AT4G10440.1 |                                                                                            | 2,5  | EM  | 5,85 10 <sup>-04</sup> |
| PSME_00031559-RA | probable methyltransferase PMT21                                    | AT1G31850 | AT1G31850.1 |                                                                                            | 3,3  | EM  | 5,34 10 <sup>-07</sup> |
| PSME_00011927-RA | probable methyltransferase PMT9 isoform X1                          | AT3G23300 | AT3G23300.1 |                                                                                            | 2,6  | EM  | 7,88 10 <sup>-04</sup> |
| PSME_00032129-RA | probable mitochondrial-processing peptidase subunit beta            | AT3G02090 | MPPBETA     | GO:0006122 GO:0006508 GO:0016485 GO:0009060                                                | 5,1  | EM  | 5,15 10 <sup>-04</sup> |
| PSME_00015539-RA | probable N-acetyl-gamma-glutamyl-phosphate reductase, chloroplastic | AT2G19940 | AT2G19940.1 | GO:0006526 GO:0046686 GO:0006520 GO:0055114                                                | 0,5  | NEC | 1,09 10 <sup>-02</sup> |
| PSME_00008314-RA | probable pectinesterase/pectinesterase inhibitor 51                 | AT5G09760 | AT5G09760.1 | GO:0045490 GO:0042545                                                                      | 0,3  | NEC | 4,50 10 <sup>-06</sup> |
| PSME_00032134-RA | probable prolyl 4-hydroxylase 6                                     | AT3G28480 | AT3G28480.2 | GO:0055114                                                                                 | 2,2  | EM  | 1,18 10 <sup>-03</sup> |
| PSME_00046703-RA | probable protein Pop3-like                                          | AT5G22580 | AT5G22580.1 |                                                                                            | 0,1  | NEC | 7,62 10 <sup>-03</sup> |
| PSME_00031401-RA | probable quinone oxidoreductase                                     | AT5G61510 | AT5G61510.1 | GO:0030154 GO:0055114 GO:0009644                                                           | 0,4  | NEC | 6,73 10 <sup>-08</sup> |
| PSME_00026241-RA | probable receptor protein kinase TMK1                               | AT2G01820 | AT2G01820.1 | GO:0009555                                                                                 | 4,6  | EM  | 6,88 10 <sup>-06</sup> |
| PSME_00018936-RA | probable rhamnose biosynthetic enzyme 1                             | AT1G63000 | NRS/ER      | GO:0010253 GO:0019305 GO:0055114 GO:0071555                                                | 3,4  | EM  | 1,49 10 <sup>-07</sup> |
| PSME_00036537-RA | probable ribose-5-phosphate isomerase 3, chloroplastic              | AT2G01290 | RPI2        | GO:0008219 GO:0010228 GO:0009052                                                           | 0,6  | NEC | 2,21 10 <sup>-02</sup> |



|                  |                                                                  |           |             |                                                                                         |     |     |       |                   |
|------------------|------------------------------------------------------------------|-----------|-------------|-----------------------------------------------------------------------------------------|-----|-----|-------|-------------------|
| PSME_00035171-RA | probable UMP/CMP kinase 3 isoform X1                             | AT5G26667 | PYR6        | GO:0006221                                                                              | 1,6 | EM  | 1,31  | 10 <sup>-03</sup> |
| PSME_00028506-RA | probable xyloglucan glycosyltransferase 5                        | AT4G31590 | CSLC5       | GO:0071555                                                                              | 2,4 | EM  | 1,88  | 10 <sup>-02</sup> |
| PSME_00032965-RA | protease Do-like 7 isoform X2                                    | AT3G03380 | DEG7        | GO:0006508                                                                              | 0,2 | NEC | 8,80  | 10 <sup>-08</sup> |
| PSME_00003897-RA | protein argonaute 10, partial                                    | AT5G43810 | AGO10       | GO:0007275 GO:0031047 GO:0006355 GO:0006351 GO:0006417 GO:0051607                       | 3,1 | EM  | 1,97  | 10 <sup>-03</sup> |
| PSME_00031420-RA | protein BONZAI 1-like                                            | AT2G32910 | AT2G32910.1 |                                                                                         | 2,0 | EM  | 2,88  | 10 <sup>-04</sup> |
| PSME_00031277-RA | protein CDI                                                      | AT1G64980 | CDI         | GO:0009846                                                                              | 1,7 | EM  | 4,15  | 10 <sup>-03</sup> |
| PSME_00044523-RA | protein COBRA-like isoform X1                                    | AT5G60920 | COB         | GO:0009651 GO:0016049 GO:0010215                                                        | 2,8 | EM  | 4,17  | 10 <sup>-03</sup> |
| PSME_00007776-RA | protein disulfide isomerase-like protein                         | AT5G60640 | PDIL1-4     | GO:0006979 GO:0045454 GO:0006457                                                        | 1,6 | EM  | 3,70  | 10 <sup>-04</sup> |
| PSME_00026375-RA | protein disulfide oxidoreductase, putative                       | AT5G38900 | AT5G38900.1 |                                                                                         | 0,2 | NEC | 9,65  | 10 <sup>-05</sup> |
| PSME_00000513-RA | protein DJ-1 homolog D-like isoform X2                           | AT3G02720 | DJ1D        |                                                                                         | 0,6 | NEC | 5,59  | 10 <sup>-03</sup> |
| PSME_00039380-RA | protein HOTHEAD-like isoform X1                                  | AT1G12570 | f5o11 31    | GO:0055114                                                                              | 0,1 | NEC | 4,68  | 10 <sup>-03</sup> |
| PSME_00025197-RA | protein notum homolog                                            | AT2G46930 | PAE3        | GO:0071555                                                                              | 0,2 | NEC | 2,62  | 10 <sup>-04</sup> |
| PSME_00001755-RA | protein RSI-1-like                                               |           |             |                                                                                         | 5,7 | EM  | 5,41  | 10 <sup>-07</sup> |
| PSME_00017679-RA | protein SGT1 homolog                                             | AT4G11260 | SGT1B       | GO:0006511 GO:0009734 GO:0050832 GO:0030163 GO:0009867 GO:0010187 GO:0009793 GO:0009408 | 0,7 | NEC | 1, 10 | 10 <sup>-02</sup> |
| PSME_00022313-RA | protein shisa-4-like                                             | AT1G63830 | AT1G63830.2 |                                                                                         | 2,0 | EM  | 1,59  | 10 <sup>-02</sup> |
| PSME_00055640-RA | protein TORNADO 2                                                | AT5G46700 | TRN2        | GO:0009956 GO:0010015                                                                   | 0,1 | NEC | 1,94  | 10 <sup>-07</sup> |
| PSME_00001066-RA | protein transport protein SEC23                                  | AT3G23660 | AT3G23660.2 | GO:0006810                                                                              | 1,5 | EM  | 1,57  | 10 <sup>-03</sup> |
| PSME_00002579-RA | protein transport protein sec24                                  | AT2G27460 | AT2G27460.1 | GO:0016192 GO:0006888 GO:0006886                                                        | 2,7 | EM  | 7,12  | 10 <sup>-04</sup> |
| PSME_00010258-RA | protein transport protein Sec24-like At3g07100                   | AT3G07100 | ERMO2       | GO:0007030 GO:0006810 GO:0016049 GO:0006888 GO:0006886                                  | 5,2 | EM  | 3,02  | 10 <sup>-04</sup> |
| PSME_00013998-RA | protein transport protein Sec24-like At4g32640 isoform X2        | AT4G32640 | AT4G32640.1 | GO:0006888 GO:0006886                                                                   | 2,7 | EM  | 3,52  | 10 <sup>-04</sup> |
| PSME_00045047-RA | protein YLS2-like                                                | AT3G51430 | YLS2        | GO:0009753 GO:0009620 GO:0009058 GO:0009723                                             | 0,5 | NEC | 6,13  | 10 <sup>-03</sup> |
| PSME_00036731-RA | purple acid phosphatase 4-like                                   | AT1G14700 | PAP3        | GO:0016311                                                                              | 0,2 | NEC | 1,91  | 10 <sup>-03</sup> |
| PSME_00000594-RA | putative 4-hydroxy-4-methyl-2-oxoglutarate aldolase 2            | AT5G16450 | AT5G16450.1 | GO:0051252                                                                              | 0,3 | NEC | 1,12  | 10 <sup>-03</sup> |
| PSME_00001217-RA | putative formamidase C869.04 isoform X4                          | AT4G37560 | AT4G37560.1 |                                                                                         | 0,2 | NEC | 1,86  | 10 <sup>-03</sup> |
| PSME_00036273-RA | putative methylesterase 11, chloroplastic                        | AT1G69240 |             |                                                                                         | 2,8 | EM  | 2,52  | 10 <sup>-03</sup> |
| PSME_00012693-RA | putative proline--tRNA ligase C19C7.06                           | AT3G62120 | AT3G62120.1 | GO:0006418 GO:0006433                                                                   | 1,7 | EM  | 1,19  | 10 <sup>-03</sup> |
| PSME_00041149-RA | pyrophosphate-energized vacuolar membrane proton pump-like       | AT1G15690 | AVP1        | GO:0048366 GO:0009651 GO:0009414 GO:0015992                                             | 2,7 | EM  | 3,23  | 10 <sup>-07</sup> |
| PSME_00016809-RA | pyruvate dehydrogenase E1 component subunit alpha, mitochondrial | AT1G59900 | E1 ALPHA    | GO:0046686 GO:0006096 GO:0055114                                                        | 0,7 | NEC | 1,04  | 10 <sup>-02</sup> |
| PSME_00016703-RA | ran-binding protein 1 homolog b                                  | AT5G58590 | RANBP1      | GO:0006511 GO:0006405 GO:0000060 GO:0051028                                             | 1,7 | EM  | 6,16  | 10 <sup>-03</sup> |
| PSME_00035817-RA | ras GTPase-activating protein-binding protein 1                  | AT3G25150 | AT3G25150.2 |                                                                                         | 3,2 | EM  | 5,91  | 10 <sup>-05</sup> |
| PSME_00006929-RA | ras-related protein RABD1                                        | AT1G02130 | RA-5        | GO:0046686 GO:0015031 GO:0006888                                                        | 1,4 | EM  | 9,29  | 10 <sup>-03</sup> |
| PSME_00042189-RA | ras-related protein RABH1e-like                                  | AT5G10260 | RABH1e      | GO:0015031 GO:0006891 GO:0042147 GO:0006890                                             | 1,9 | EM  | 2,54  | 10 <sup>-03</sup> |
| PSME_00009436-RA | receptor-like protein kinase FERONIA                             | AT3G51550 | FER         | GO:0048364 GO:0009742 GO:0046777 GO:0006468 GO:0009723 GO:0009791 GO:0050832 GO:0009738 | 2,0 | EM  | 6,11  | 10 <sup>-03</sup> |
| PSME_00038375-RA | receptor-like protein kinase THESEUS 1                           | AT5G54380 | THE1        | GO:0009826 GO:0009742 GO:0046777 GO:0006468 GO:0009791                                  | 2,9 | EM  | 1,20  | 10 <sup>-04</sup> |
| PSME_00020246-RA | reticulocalbin-2                                                 | AT5G08580 | AT5G08580.1 |                                                                                         | 0,5 | NEC | 8,19  | 10 <sup>-03</sup> |
| PSME_00019330-RA | reticulon-like protein B1                                        | AT4G11220 | BTI2        |                                                                                         | 1,5 | EM  | 2,63  | 10 <sup>-02</sup> |
| PSME_00046521-RA | ribonuclease 1-like                                              | AT1G26820 | RNS3        |                                                                                         | 3,5 | EM  | 1,02  | 10 <sup>-03</sup> |
| PSME_00029357-RA | RNA-binding protein 24-B                                         | AT1G76460 | AT1G76460.1 |                                                                                         | 6,3 | EM  | 4,44  | 10 <sup>-04</sup> |
| PSME_00002235-RA | RNA-binding protein Nova-1 isoform X2                            | AT5G04430 | BTR1L       | GO:0008380 GO:0009735                                                                   | 1,4 | EM  | 5,70  | 10 <sup>-03</sup> |

|                  |                                                                         |           |             |                                                                   |     |     |                        |
|------------------|-------------------------------------------------------------------------|-----------|-------------|-------------------------------------------------------------------|-----|-----|------------------------|
| PSME_0000537-RA  | ruBisCO large subunit-binding protein subunit alpha isoform X1          | AT2G28000 | CPN60A      | GO:0009658 GO:0006457 GO:0009790 GO:0007005 GO:0061077 GO:0006458 | 0,8 | NEC | 7,12 10 <sup>-03</sup> |
| PSME_00025101-RA | S-adenosylmethionine synthase 1                                         | AT2G36880 | MAT3        | GO:0009809 GO:0006556 GO:0006730                                  | 2,5 | EM  | 1,86 10 <sup>-06</sup> |
| PSME_00026577-RA | S-adenosylmethionine synthase 2                                         | AT3G17390 | MTO3        | GO:0009409 GO:0006555 GO:0009809 GO:0006556 GO:0006730            | 0,3 | NEC | 2,46 10 <sup>-03</sup> |
| PSME_00028718-RA | S-adenosylmethionine synthase 2                                         | AT3G17390 | MTO3        | GO:0006730 GO:0006556 GO:0006555 GO:0009809 GO:0009409            | 0,7 | NEC | 6,87 10 <sup>-03</sup> |
| PSME_00026579-RA | S-adenosylmethionine synthase 5                                         | AT3G17390 | MTO3        | GO:0009409 GO:0006555 GO:0009809 GO:0006556 GO:0006730            | 0,1 | NEC | 3,88 10 <sup>-04</sup> |
| PSME_00033735-RA | serine carboxypeptidase-like 27                                         | AT3G07990 | SCPL27      | GO:0006508 GO:0051603                                             | 3,0 | EM  | 1,26 10 <sup>-02</sup> |
| PSME_00033307-RA | Serine carboxypeptidase-like 35                                         | AT5G08260 | scpl35      | GO:0051603 GO:0006508                                             | 0,3 | NEC | 7,09 10 <sup>-05</sup> |
| PSME_00002021-RA | serine carboxypeptidase-like 45                                         | AT1G28110 | SCPL45      | GO:0006508 GO:0051603                                             | 8,4 | EM  | 3,56 10 <sup>-07</sup> |
| PSME_00033213-RA | serine carboxypeptidase-like 45                                         | AT1G28110 | SCPL45      | GO:0006508 GO:0051603                                             | 3,3 | EM  | 2,66 10 <sup>-06</sup> |
| PSME_00031997-RA | serine carboxypeptidase-like enzyme                                     | AT5G42240 | scpl42      | GO:0051603 GO:0006508                                             | 5,3 | EM  | 3,50 10 <sup>-05</sup> |
| PSME_00014571-RA | serine/threonine-protein phosphatase 5                                  | AT2G42810 | PP5.2       | GO:0046686 GO:0006470                                             | 1,4 | EM  | 8,15 10 <sup>-03</sup> |
| PSME_00007668-RA | S-formylglutathione hydrolase                                           | AT2G41530 | SFGH        | GO:0046686                                                        | 0,7 | NEC | 1,73 10 <sup>-02</sup> |
| PSME_00010789-RA | signal recognition particle receptor subunit alpha                      | AT4G30600 | AT4G30600.1 | GO:0006614 GO:0006605                                             | 0,5 | NEC | 2,78 10 <sup>-04</sup> |
| PSME_00005435-RA | single-stranded DNA-binding protein WHY1, chloroplastic-like isoform X2 | AT1G14410 | WHY1        | GO:0006351 GO:0006952 GO:0006281 GO:0006355                       | 3,0 | EM  | 1,13 10 <sup>-04</sup> |
| PSME_00013696-RA | small nuclear ribonucleoprotein Sm D2-like                              | AT3G62840 | AT3G62840.1 | GO:0008380                                                        | 1,3 | EM  | 2,85 10 <sup>-03</sup> |
| PSME_00028857-RA | Soluble inorganic pyrophosphatase                                       | AT1G01050 | PPa1        | GO:0019915 GO:0006796                                             | 2,0 | EM  | 5,79 10 <sup>-05</sup> |
| PSME_00015642-RA | staphylococcal nuclease domain-containing protein 1                     | AT5G07350 | Tudor1      | GO:0009651 GO:0006402 GO:0046686 GO:0006397 GO:0031047 GO:0009306 | 1,4 | EM  | 7,08 10 <sup>-03</sup> |
| PSME_00014875-RA | stress responsive A/B barrel domain protein                             | AT2G31670 | UP3         |                                                                   | 0,5 | NEC | 2,30 10 <sup>-04</sup> |
| PSME_00029325-RA | strictosidine synthase 1-like                                           | AT3G57030 | AT3G57030.1 | GO:0009058                                                        | 0,6 | NEC | 2,10 10 <sup>-03</sup> |
| PSME_00005252-RA | subtilisin-like protease                                                | AT5G67360 | ARA12       | GO:0006508                                                        | 0,1 | NEC | 3,99 10 <sup>-04</sup> |
| PSME_00003877-RA | sucrose synthase 2                                                      | AT4G02280 | SUS3        | GO:0005986 GO:0009414 GO:0005985                                  | 0,4 | NEC | 5,80 10 <sup>-05</sup> |
| PSME_00003878-RA | sucrose synthase 3-like                                                 | AT4G02280 | SUS3        | GO:0005985 GO:0009414 GO:0005986                                  | 0,3 | NEC | 6,44 10 <sup>-05</sup> |
| PSME_00022970-RA | superkiller viralicidic activity 2-like 2                               | AT2G06990 | HEN2        | GO:0006397 GO:0016070                                             | 1,7 | EM  | 1,79 10 <sup>-05</sup> |
| PSME_00018456-RA | T-complex protein 1 subunit beta                                        | AT5G20890 | AT5G20890.1 |                                                                   | 1,3 | EM  | 1,12 10 <sup>-02</sup> |
| PSME_00016087-RA | thaumatin-like protein                                                  | AT1G18250 | ATLP-1      | GO:0051707                                                        | 0,2 | NEC | 5,79 10 <sup>-03</sup> |
| PSME_00001915-RA | thiol protease aleurain-like                                            | AT3G45310 | AT3G45310.1 | GO:0006508                                                        | 7,0 | EM  | 2,17 10 <sup>-05</sup> |
| PSME_00014373-RA | thiol protease aleurain-like                                            | AT3G45310 | AT3G45310.1 | GO:0006508                                                        | 2,0 | EM  | 1,10 10 <sup>-02</sup> |
| PSME_00042511-RA | Thioredoxin                                                             | AT1G11530 | CXXS1       | GO:0045454                                                        | 0,1 | NEC | 4,62 10 <sup>-03</sup> |
| PSME_00050044-RA | thioredoxin H4-1                                                        | AT3G08710 | TH9         | GO:0055114 GO:0045454 GO:0007154                                  | 2,2 | EM  | 7,22 10 <sup>-04</sup> |
| PSME_00049348-RA | ToiB protein-related isoform 2, partial                                 | AT1G21670 | AT1G21670.1 |                                                                   | 0,3 | NEC | 1,89 10 <sup>-02</sup> |
| PSME_00037425-RA | transaldolase-like protein                                              | AT5G13420 | TRA2        | GO:0006098 GO:0005975 GO:0009809 GO:0046686                       | 0,2 | NEC | 3,30 10 <sup>-08</sup> |
| PSME_00042167-RA | transketolase, chloroplastic                                            | AT2G45290 | TKL2        | GO:0046686                                                        | 0,4 | NEC | 3,28 10 <sup>-06</sup> |
| PSME_00040482-RA | transmembrane 9 superfamily member 2                                    | AT2G01970 | AT2G01970.1 | GO:0006810                                                        | 1,6 | EM  | 1,89 10 <sup>-04</sup> |
| PSME_00006153-RA | transmembrane 9 superfamily member 4-like                               | AT3G13772 | TMN7        | GO:0006811                                                        | 2,0 | EM  | 1,47 10 <sup>-06</sup> |
| PSME_00007345-RA | transmembrane 9 superfamily member 7                                    | AT3G13772 | TMN7        | GO:0006811                                                        | 4,3 | EM  | 5,12 10 <sup>-09</sup> |
| PSME_00033866-RA | transmembrane nine 7 isoform 1                                          | AT3G13772 | TMN7        | GO:0006811                                                        | 1,7 | EM  | 3,28 10 <sup>-03</sup> |
| PSME_00011992-RA | transmembrane protein, putative                                         | AT3G12650 | AT3G12650.1 |                                                                   | 0,5 | NEC | 3,27 10 <sup>-03</sup> |
| PSME_00025791-RA | triosephosphate isomerase, chloroplastic                                | AT2G21170 | TIM         | GO:0006094 GO:0080022 GO:0009658 GO:0006096 GO:0019253            | 0,5 | NEC | 1,31 10 <sup>-04</sup> |
| PSME_00048393-RA | tRNA pseudouridine synthase A, mitochondrial-like                       | AT1G20370 | AT1G20370.1 |                                                                   | 3,5 | EM  | 2,05 10 <sup>-05</sup> |
| PSME_00048275-RA | tropinone reductase-like 3                                              | AT4G05530 | IBR1        | GO:0006631 GO:0055114                                             | 1,3 | EM  | 2,78 10 <sup>-02</sup> |
| PSME_00001420-RA | tryptophan--tRNA ligase, cytoplasmic                                    | AT3G04600 | AT3G04600.1 | GO:0006418                                                        | 1,4 | EM  | 2,59 10 <sup>-04</sup> |
| PSME_00010571-RA | tubulin alpha chain                                                     | AT1G50010 | TUA2        | GO:0007017 GO:0009651                                             | 1,5 | EM  | 9,97 10 <sup>-03</sup> |

|                  |                                                                     |           |             |                                                                                                       |      |     |                        |
|------------------|---------------------------------------------------------------------|-----------|-------------|-------------------------------------------------------------------------------------------------------|------|-----|------------------------|
| PSME_00048529-RA | tubulin alpha chain                                                 | AT1G50010 | TUA2        | GO:0007017 GO:0009651                                                                                 | 2,2  | EM  | 3,81 10 <sup>-03</sup> |
| PSME_00045437-RA | tubulin alpha-3 chain                                               | AT5G19780 | TUA5        | GO:0007017 GO:0046686                                                                                 | 0,5  | NEC | 7,29 10 <sup>-03</sup> |
| PSME_00045033-RA | tubulin alpha-3 chain-like                                          | AT5G19780 | TUA5        | GO:0046686 GO:0007017                                                                                 | 0,5  | NEC | 2,77 10 <sup>-04</sup> |
| PSME_00022639-RA | tubulin beta-1 chain                                                | AT5G12250 | TUB6        | GO:0009651 GO:0007017 GO:0009409                                                                      | 2,0  | EM  | 2,80 10 <sup>-04</sup> |
| PSME_00037947-RA | two-on-two hemoglobin-3                                             | AT4G32690 | GLB3        | GO:0009733 GO:0015671                                                                                 | 3,5  | EM  | 6,36 10 <sup>-03</sup> |
| PSME_00013135-RA | U1 small nuclear ribonucleoprotein A-like                           | AT1G76940 | AT1G76940.1 |                                                                                                       | 1,5  | EM  | 1,42 10 <sup>-02</sup> |
| PSME_00016277-RA | ubiquinol oxidase 1a, mitochondrial-like                            | AT3G22370 | AOX1A       | GO:0009409 GO:0055114                                                                                 | 4,6  | EM  | 1,72 10 <sup>-06</sup> |
| PSME_00009309-RA | ubiquitin-conjugating enzyme E2 7                                   | AT3G46460 | UBC13       | GO:0006511 GO:0000209                                                                                 | 3,0  | EM  | 2,21 10 <sup>-03</sup> |
| PSME_00009333-RA | UBP1-associated protein 2B-like                                     | AT2G41060 | AT2G41060.1 | GO:0008219 GO:0006952                                                                                 | 1,9  | EM  | 1,69 10 <sup>-04</sup> |
| PSME_00024734-RA | UDP-arabinopyranose mutase 1                                        | AT3G02230 | RGP1        | GO:0009651 GO:0009832 GO:0009555 GO:0071555 GO:0033356<br>GO:0030244                                  | 5,3  | EM  | 7,83 10 <sup>-09</sup> |
| PSME_00032374-RA | UDP-D-apiose/UDP-D-xylose synthase 2                                | AT1G08200 |             | GO:0009226 GO:0071555                                                                                 | 1,5  | EM  | 2,49 10 <sup>-03</sup> |
| PSME_00028107-RA | UDP-glucose 6-dehydrogenase 4                                       | AT3G29360 | UGD2        | GO:0005975 GO:0055114 GO:0006024                                                                      | 2,2  | EM  | 1,93 10 <sup>-06</sup> |
| PSME_00003124-RA | UDP-glucose:glycoprotein glucosyltransferase                        | AT1G71220 |             | GO:0006486 GO:0018279                                                                                 | 1,4  | EM  | 1,19 10 <sup>-02</sup> |
| PSME_00000157-RA | UDP-glucuronate 4-epimerase 3                                       | AT1G02000 | GAE2        | GO:0005975                                                                                            | 1,8  | EM  | 3,37 10 <sup>-04</sup> |
| PSME_00031028-RA | UDP-glucuronic acid decarboxylase 2-like                            | AT3G62830 |             | GO:0019305                                                                                            | 1,8  | EM  | 4,42 10 <sup>-04</sup> |
| PSME_00022060-RA | UDP-glucuronic acid decarboxylase 6-like                            | AT2G28760 | UXS6        |                                                                                                       | 2,5  | EM  | 2,49 10 <sup>-03</sup> |
| PSME_00024031-RA | UF642 I-GalL-responsive protein 1                                   | AT5G25460 | DGR2        | GO:0010015 GO:0080167                                                                                 | 5,6  | EM  | 1,46 10 <sup>-08</sup> |
| PSME_00038002-RA | UF642 I-GalL-responsive protein 1                                   | AT5G25460 | DGR2        | GO:0010015 GO:0080167                                                                                 | 4,2  | EM  | 1,90 10 <sup>-05</sup> |
| PSME_00026496-RA | Uncharacterized protein isoform 1                                   | AT5G13500 | AT5G13500.1 |                                                                                                       | 0,2  | NEC | 1,26 10 <sup>-02</sup> |
| PSME_00046317-RA | Uncharacterized protein isoform 1                                   | AT1G07040 | AT1G07040.1 |                                                                                                       | 0,1  | NEC | 5,45 10 <sup>-03</sup> |
| PSME_00000641-RA | Uncharacterized protein L484_007981                                 | AT3G20790 | AT3G20790.1 | GO:0055114                                                                                            | 1,5  | EM  | 1,90 10 <sup>-02</sup> |
| PSME_00026338-RA | Uncharacterized protein TCM_006340                                  | AT3G49720 | CGR2        | GO:0040007 GO:0045489                                                                                 | 2,3  | EM  | 1,60 10 <sup>-05</sup> |
| PSME_00049835-RA | uninformative                                                       |           |             |                                                                                                       | 5,3  | EM  | 2,69 10 <sup>-07</sup> |
| PSME_00031292-RA | vacuolar amino acid transporter 1                                   | AT2G39130 | AT2G39130.1 |                                                                                                       | 28,2 | EM  | 1,99 10 <sup>-06</sup> |
| PSME_00000072-RA | very-long-chain (3R)-3-hydroxyacyl-CoA dehydratase<br>PASTICCINO 2A | AT5G10480 | PAS2        | GO:0007275 GO:0030154 GO:0051302                                                                      | 0,7  | NEC | 6,21 10 <sup>-03</sup> |
| PSME_00016527-RA | villin-2                                                            | AT2G41740 | VLN2        | GO:0007010 GO:0051017                                                                                 | 1,9  | EM  | 6,21 10 <sup>-05</sup> |
| PSME_00000168-RA | villin-3                                                            | AT3G57410 | VLN3        | GO:0051017 GO:0007010                                                                                 | 0,5  | NEC | 1,02 10 <sup>-02</sup> |
| PSME_00015064-RA | V-type proton ATPase 16 kDa proteolipid subunit-like                | AT1G19910 |             | GO:0015991                                                                                            | 2,8  | EM  | 1,34 10 <sup>-06</sup> |
| PSME_00004177-RA | V-type proton ATPase catalytic subunit A                            | AT1G78900 | VHA-A       | GO:0015992 GO:0015991 GO:0009555 GO:0009651 GO:0046034<br>GO:0007030                                  | 1,4  | EM  | 1,42 10 <sup>-03</sup> |
| PSME_00002523-RA | V-type proton ATPase subunit a3                                     | AT4G39080 | VHA-A3      | GO:0070072 GO:0015986 GO:0015991                                                                      | 2,0  | EM  | 3,20 10 <sup>-05</sup> |
| PSME_00004839-RA | V-type proton ATPase subunit C                                      | AT1G12840 | DET3        | GO:0009809 GO:0015991 GO:0009826                                                                      | 1,8  | EM  | 1,90 10 <sup>-04</sup> |
| PSME_00001707-RA | V-type proton ATPase subunit d2                                     | AT3G28715 | AT3G28715.1 | GO:0015991 GO:0015992                                                                                 | 1,9  | EM  | 1,97 10 <sup>-03</sup> |
| PSME_00023262-RA | V-type proton ATPase subunit E                                      | AT4G11150 | TUF         | GO:0009409 GO:0042742 GO:0015991 GO:0009735 GO:0009832<br>GO:0009793 GO:0009651 GO:0015986 GO:0007030 | 1,4  | EM  | 9,52 10 <sup>-03</sup> |
| PSME_00015864-RA | YTH domain-containing family protein 1 isoform X1                   | AT3G13460 | ECT2        |                                                                                                       | 2,3  | EM  | 9,38 10 <sup>-03</sup> |
| PSME_00011787-RA | YTH domain-containing family protein 2                              | AT1G48110 | ECT7        |                                                                                                       | 1,9  | EM  | 2,67 10 <sup>-04</sup> |
| PSME_00014883-RA | YTH domain-containing family protein 2                              | AT1G48110 | ECT7        |                                                                                                       | 1,9  | EM  | 5,66 10 <sup>-03</sup> |
| PSME_00034990-RA | zinc finger CCCH domain-containing protein 14-like                  | AT5G06770 | AT5G06770.1 | GO:0006355                                                                                            | 3,0  | EM  | 5,07 10 <sup>-04</sup> |
